# Supplementary material for: DFT approach towards accurate prediction of 1H/13C NMR chemical shifts for dipterocarpol oxime
Source: Royal Society of Chemistry journal article supplement (doi:10.1039/d3ra04688e), 2023-01-01
Supplement: d3ra04688e1.pdf [file d3ra04688e1.pdf]

## DFT approach towards accurate prediction of $^1\text{H}/^{13}\text{C}$ NMR chemical shifts for dipteroicarpol oxime

Phong Q. Le<sup>1</sup>, Trang T. Q. Phan<sup>1</sup>, Thien T. Nguyen<sup>2,3\*</sup>

<sup>1</sup> School of Biotechnology, International University, VNU-HCM, Quarter 6, Linh Trung Ward, Thu Duc City, Ho Chi Minh City, Vietnam

<sup>2</sup> Faculty of Pharmacy, College of Medicine and Pharmacy, Duy Tan University, Da Nang 550000, Vietnam

<sup>3</sup> Institute of Research and Development, Duy Tan University, Da Nang 550000, Vietnam

\*Corresponding Author: [nguyentrongthien@duytan.edu.vn](mailto:nguyentrongthien@duytan.edu.vn)

### Supporting Information

#### Table of content

1. Screening DFT methods for  $^1\text{H}/^{13}\text{C}$  calculations
2. Boltzmann weighing calculations for major contributing conformers
3.  $^1\text{H}/^{13}\text{C}$  NMR of dipteroicarpol and  $^1\text{H}/^{13}\text{C}$  NMR and COSY spectra of oxime
4. Cartesian coordinates of major contributing conformers for oxime 1 optimized at the level PCM( $\text{CHCl}_3$ )/B3LYP/6-31G(d,p)

1. Screening DFT methods for  $^1\text{H}/^{13}\text{C}$  calculations of oxime **1**

Table S1. Screening density functional methods and basis sets for  $^{13}\text{C}$  calculations

|              | B97D   |      | BPV86  |      | HCTH   |      | LSDA   |      | M062X  |      | PBEPBE |      | TPSSTPSS |      |
|--------------|--------|------|--------|------|--------|------|--------|------|--------|------|--------|------|----------|------|
|              | $r^2$  | RMSE | $r^2$  | RMSE | $r^2$  | RMSE | $r^2$  | RMSE | $r^2$  | RMSE | $r^2$  | RMSE | $r^2$    | RMSE |
| 6-31G        | 0.9958 | 2.32 | 0.9951 | 2.50 | 0.9969 | 2.00 | 0.9943 | 2.71 | 0.9984 | 1.41 | 0.9957 | 2.34 | 0.9968   | 2.01 |
| 6-31G(d,p)   | 0.9957 | 2.35 | 0.9951 | 2.51 | 0.9970 | 1.97 | 0.9942 | 2.74 | 0.9984 | 1.42 | 0.9955 | 2.40 | 0.9971   | 1.94 |
| 6-31+G(d,p)  | 0.9970 | 1.98 | 0.9965 | 2.11 | 0.9963 | 2.17 | 0.9959 | 2.29 | 0.9979 | 1.64 | 0.9968 | 2.03 | 0.9975   | 1.78 |
| 6-31++G(d,p) | 0.9972 | 1.90 | 0.9972 | 1.90 | 0.9971 | 1.94 | 0.9968 | 2.03 | 0.9978 | 1.70 | 0.9973 | 1.86 | 0.9978   | 1.67 |
| 6-311G(d,p)  | 0.9958 | 2.31 | 0.9952 | 2.48 | 0.9962 | 2.21 | 0.9940 | 2.78 | 0.9978 | 1.68 | 0.9953 | 2.45 | 0.9968   | 2.03 |
| 6-31G(d,3p)  | 0.9948 | 2.58 | 0.9941 | 2.76 | 0.9957 | 2.35 | 0.9930 | 3.00 | 0.9983 | 1.46 | 0.9945 | 2.65 | 0.9964   | 2.16 |
| 6-31G(3d,p)  | 0.9873 | 4.06 | 0.9871 | 4.08 | 0.9898 | 3.64 | 0.9852 | 4.39 | 0.9949 | 2.55 | 0.9881 | 3.94 | 0.9903   | 3.55 |
| 6-31G(3d,3p) | 0.9823 | 4.80 | 0.9823 | 4.80 | 0.9853 | 4.38 | 0.9797 | 5.15 | 0.9895 | 3.68 | 0.9833 | 4.66 | 0.9860   | 4.26 |
| cc-pVDZ      | 0.9946 | 2.62 | 0.9940 | 2.77 | 0.9948 | 2.59 | 0.9932 | 2.96 | 0.9983 | 1.49 | 0.9943 | 2.70 | 0.9961   | 2.24 |
| DGDZVP       | 0.9973 | 1.87 | 0.9968 | 2.02 | 0.9979 | 1.64 | 0.9958 | 2.31 | 0.9977 | 1.73 | 0.9971 | 1.93 | 0.9982   | 1.54 |
| DGDZVP2      | 0.9949 | 2.55 | 0.9949 | 2.57 | 0.9956 | 2.37 | 0.9942 | 2.72 | 0.9980 | 1.62 | 0.9953 | 2.45 | 0.9964   | 2.15 |

All values are in ppm.

Table S2. Screening density functional methods and basis sets for  $^1\text{H}$  calculations

|              | B97D   |       | B3PW91 |       | CAMB3LYP |       | M062X  |       | mPW1PW91 |       | TPSSTPSS |       | $\omega\text{B97XD}$ |       |
|--------------|--------|-------|--------|-------|----------|-------|--------|-------|----------|-------|----------|-------|----------------------|-------|
|              | $r^2$  | RMSE  | $r^2$  | RMSE  | $r^2$    | RMSE  | $r^2$  | RMSE  | $r^2$    | RMSE  | $r^2$    | RMSE  | $r^2$                | RMSE  |
| 6-31G        | 0.9885 | 0.126 | 0.9913 | 0.109 | 0.9907   | 0.113 | 0.9865 | 0.137 | 0.9911   | 0.111 | 0.9913   | 0.109 | 0.9853               | 0.143 |
| 6-31G(d,p)   | 0.9850 | 0.144 | 0.9877 | 0.130 | 0.9869   | 0.135 | 0.9805 | 0.165 | 0.9873   | 0.133 | 0.9878   | 0.130 | 0.9845               | 0.159 |
| 6-31+G(d,p)  | 0.9864 | 0.137 | 0.9887 | 0.125 | 0.9887   | 0.125 | 0.9804 | 0.165 | 0.9886   | 0.126 | 0.9893   | 0.122 | 0.9776               | 0.177 |
| 6-31++G(d,p) | 0.9823 | 0.157 | 0.9844 | 0.147 | 0.9862   | 0.139 | 0.9831 | 0.153 | 0.9843   | 0.148 | 0.9836   | 0.151 | 0.9864               | 0.137 |
| 6-311G(d,p)  | 0.9828 | 0.155 | 0.9870 | 0.134 | 0.9861   | 0.139 | 0.9804 | 0.165 | 0.9866   | 0.136 | 0.9878   | 0.130 | 0.9868               | 0.135 |
| 6-31G(d,3p)  | 0.9836 | 0.151 | 0.9867 | 0.136 | 0.9856   | 0.141 | 0.9818 | 0.159 | 0.9864   | 0.137 | 0.9873   | 0.133 | 0.9835               | 0.151 |
| 6-31G(3d,p)  | 0.9669 | 0.216 | 0.9800 | 0.167 | 0.9804   | 0.165 | 0.9694 | 0.208 | 0.9802   | 0.166 | 0.9787   | 0.173 | 0.9835               | 0.162 |
| 6-31G(3d,3p) | 0.9579 | 0.245 | 0.9789 | 0.172 | 0.9803   | 0.166 | 0.9462 | 0.279 | 0.9790   | 0.171 | 0.9766   | 0.181 | 0.9772               | 0.179 |
| cc-pVDZ      | 0.9832 | 0.153 | 0.9858 | 0.140 | 0.9845   | 0.147 | 0.9790 | 0.171 | 0.9854   | 0.142 | 0.9868   | 0.135 | 0.9833               | 0.152 |
| DGDZVP       | 0.9845 | 0.147 | 0.9853 | 0.143 | 0.9858   | 0.140 | 0.9820 | 0.158 | 0.9846   | 0.146 | 0.9865   | 0.137 | 0.9800               | 0.167 |
| DGDZVP2      | 0.9867 | 0.136 | 0.9882 | 0.128 | 0.9876   | 0.131 | 0.9809 | 0.163 | 0.9879   | 0.130 | 0.9890   | 0.123 | 0.9830               | 0.154 |

All values are in ppm.

Table S3. NMR calculation times for the global minimum

|              | B3LYP | B3PW91 | B97D | BPV86 | CAM-B3LYP | HCTH | HSEH1PBE | LSDA | M062X | mPW1PW91 | PBEPBE | TPSSTPSS | @B97XD |
|--------------|-------|--------|------|-------|-----------|------|----------|------|-------|----------|--------|----------|--------|
| 6-31G        | 0.57  | 0.57   | 0.40 | 0.41  | 0.71      | 0.42 | 0.63     | 0.38 | 0.76  | 0.58     | 0.41   | 0.58     | 0.71   |
| 6-31G(d,p)   | 1.94  | 1.87   | 1.03 | 1.02  | 2.25      | 0.99 | 1.87     | 0.95 | 2.40  | 1.88     | 0.99   | 1.41     | 2.27   |
| 6-31G(d,3p)  | 4.53  | 4.53   | 2.40 | 2.15  | 5.57      | 2.32 | 4.47     | 1.91 | 5.46  | 4.55     | 2.16   | 2.89     | 5.61   |
| 6-31G(3d,p)  | 9.03  | 8.66   | 3.69 | 3.55  | 10.65     | 3.53 | 9.19     | 3.18 | 9.94  | 8.54     | 3.54   | 4.19     | 11.59  |
| 6-31G(3d,3p) | 16.63 | 16.65  | 6.65 | 6.54  | 22.36     | 6.61 | 17.20    | 5.87 | 20.29 | 17.20    | 6.45   | 7.12     | 21.97  |
| 6-31+G(d,p)  | 7.36  | 6.92   | 2.70 | 2.73  | 8.84      | 2.97 | 6.81     | 2.40 | 8.65  | 6.87     | 2.72   | 3.71     | 9.01   |
| 6-31++G(d,p) | 11.18 | 12.56  | 4.51 | 4.46  | 14.84     | 4.41 | 11.20    | 4.68 | 13.13 | 11.28    | 4.45   | 5.32     | 15.21  |
| 6-311G(d,p)  | 4.02  | 4.14   | 1.88 | 1.87  | 4.69      | 1.90 | 4.15     | 1.69 | 4.90  | 4.07     | 1.87   | 2.50     | 4.89   |
| cc-pVDZ      | 3.52  | 3.50   | 1.85 | 1.83  | 4.81      | 1.78 | 4.39     | 1.73 | 4.69  | 3.56     | 1.86   | 2.31     | 4.83   |
| DGDZVP       | 2.59  | 2.39   | 1.36 | 1.33  | 3.27      | 1.32 | 2.81     | 1.32 | 3.00  | 2.41     | 2.92   | 1.72     | 3.25   |
| DGDZVP2      | 4.92  | 4.60   | 2.31 | 2.27  | 6.15      | 2.27 | 5.09     | 2.10 | 5.16  | 4.33     | 2.27   | 2.79     | 6.03   |

Time values are in hour.

## 2. Boltzmann weighting calculations for major contributing conformers

Table S4. Boltzmann weighing of major contributing conformers

| Conformer | Energy (Hartree) | Relative energy (kJ mol <sup>-1</sup> ) | Boltzmann weighting | Percentage contribution (%) |
|-----------|------------------|-----------------------------------------|---------------------|-----------------------------|
| 1         | -1379.10108537   | 0.00                                    | 1.00                | 37.17                       |
| 2         | -1379.10021687   | 2.28                                    | 0.40                | 14.81                       |
| 3         | -1379.10008163   | 2.64                                    | 0.35                | 12.83                       |
| 4         | -1379.09979053   | 3.40                                    | 0.25                | 9.42                        |
| 5         | -1379.09916033   | 5.05                                    | 0.13                | 4.83                        |
| 6         | -1379.09904181   | 5.37                                    | 0.11                | 4.26                        |
| 7         | -1379.09899411   | 5.49                                    | 0.11                | 4.05                        |
| 8         | -1379.09887102   | 5.81                                    | 0.10                | 3.56                        |
| 9         | -1379.09863435   | 6.44                                    | 0.07                | 2.77                        |
| 10        | -1379.09811452   | 7.80                                    | 0.04                | 1.60                        |
| 11        | -1379.09782408   | 8.56                                    | 0.03                | 1.17                        |
| 12        | -1379.09776823   | 8.71                                    | 0.03                | 1.11                        |
| 13        | -1379.09762826   | 9.08                                    | 0.03                | 0.95                        |
| 14        | -1379.09746482   | 9.51                                    | 0.02                | 0.80                        |
| 15        | -1379.09730329   | 9.93                                    | 0.02                | 0.68                        |

3.  $^1\text{H}/^{13}\text{C}$  NMR spectra of dipterocarpol and  $^1\text{H}/^{13}\text{C}$  NMR and COSY spectra of oxime **1**

a.  $^1\text{H}/^{13}\text{C}$  NMR spectra of dipterocarpol

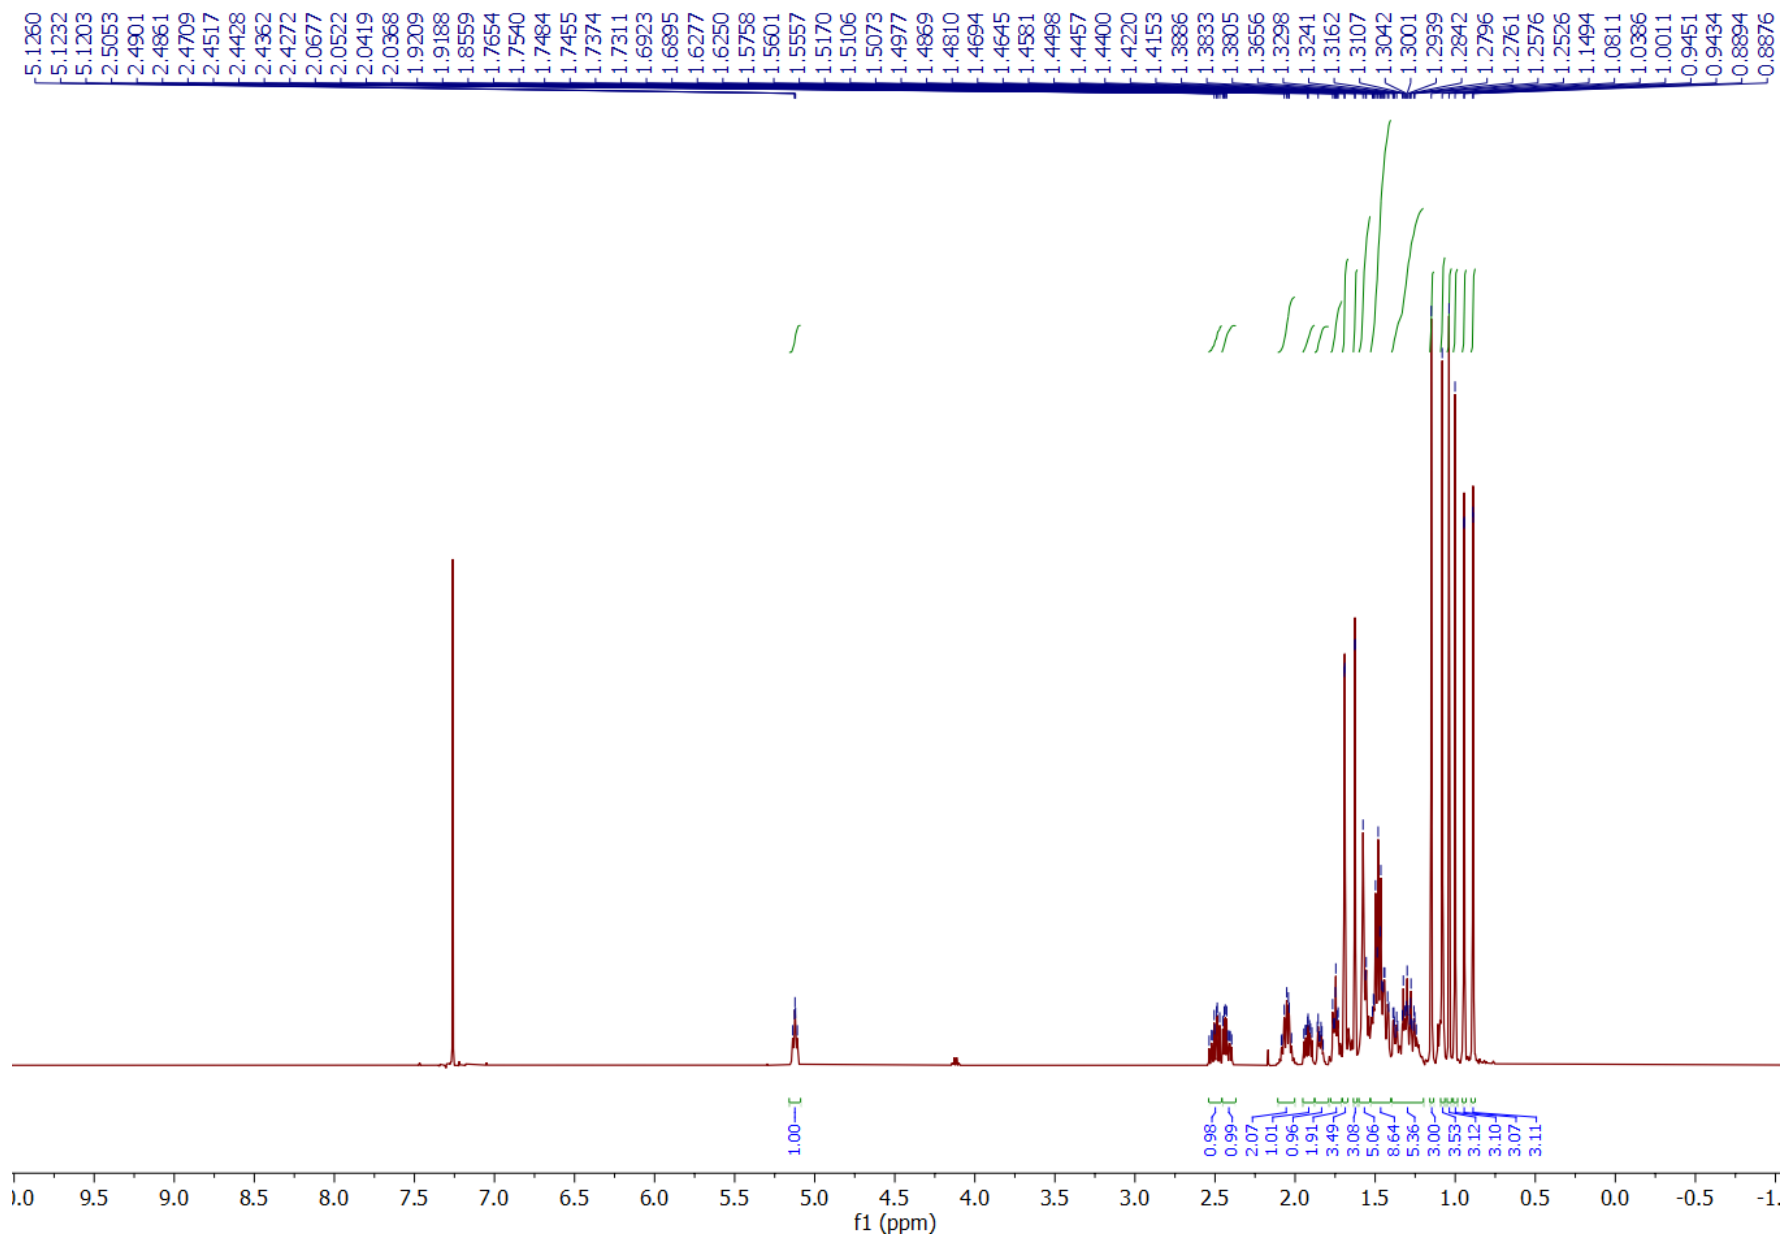

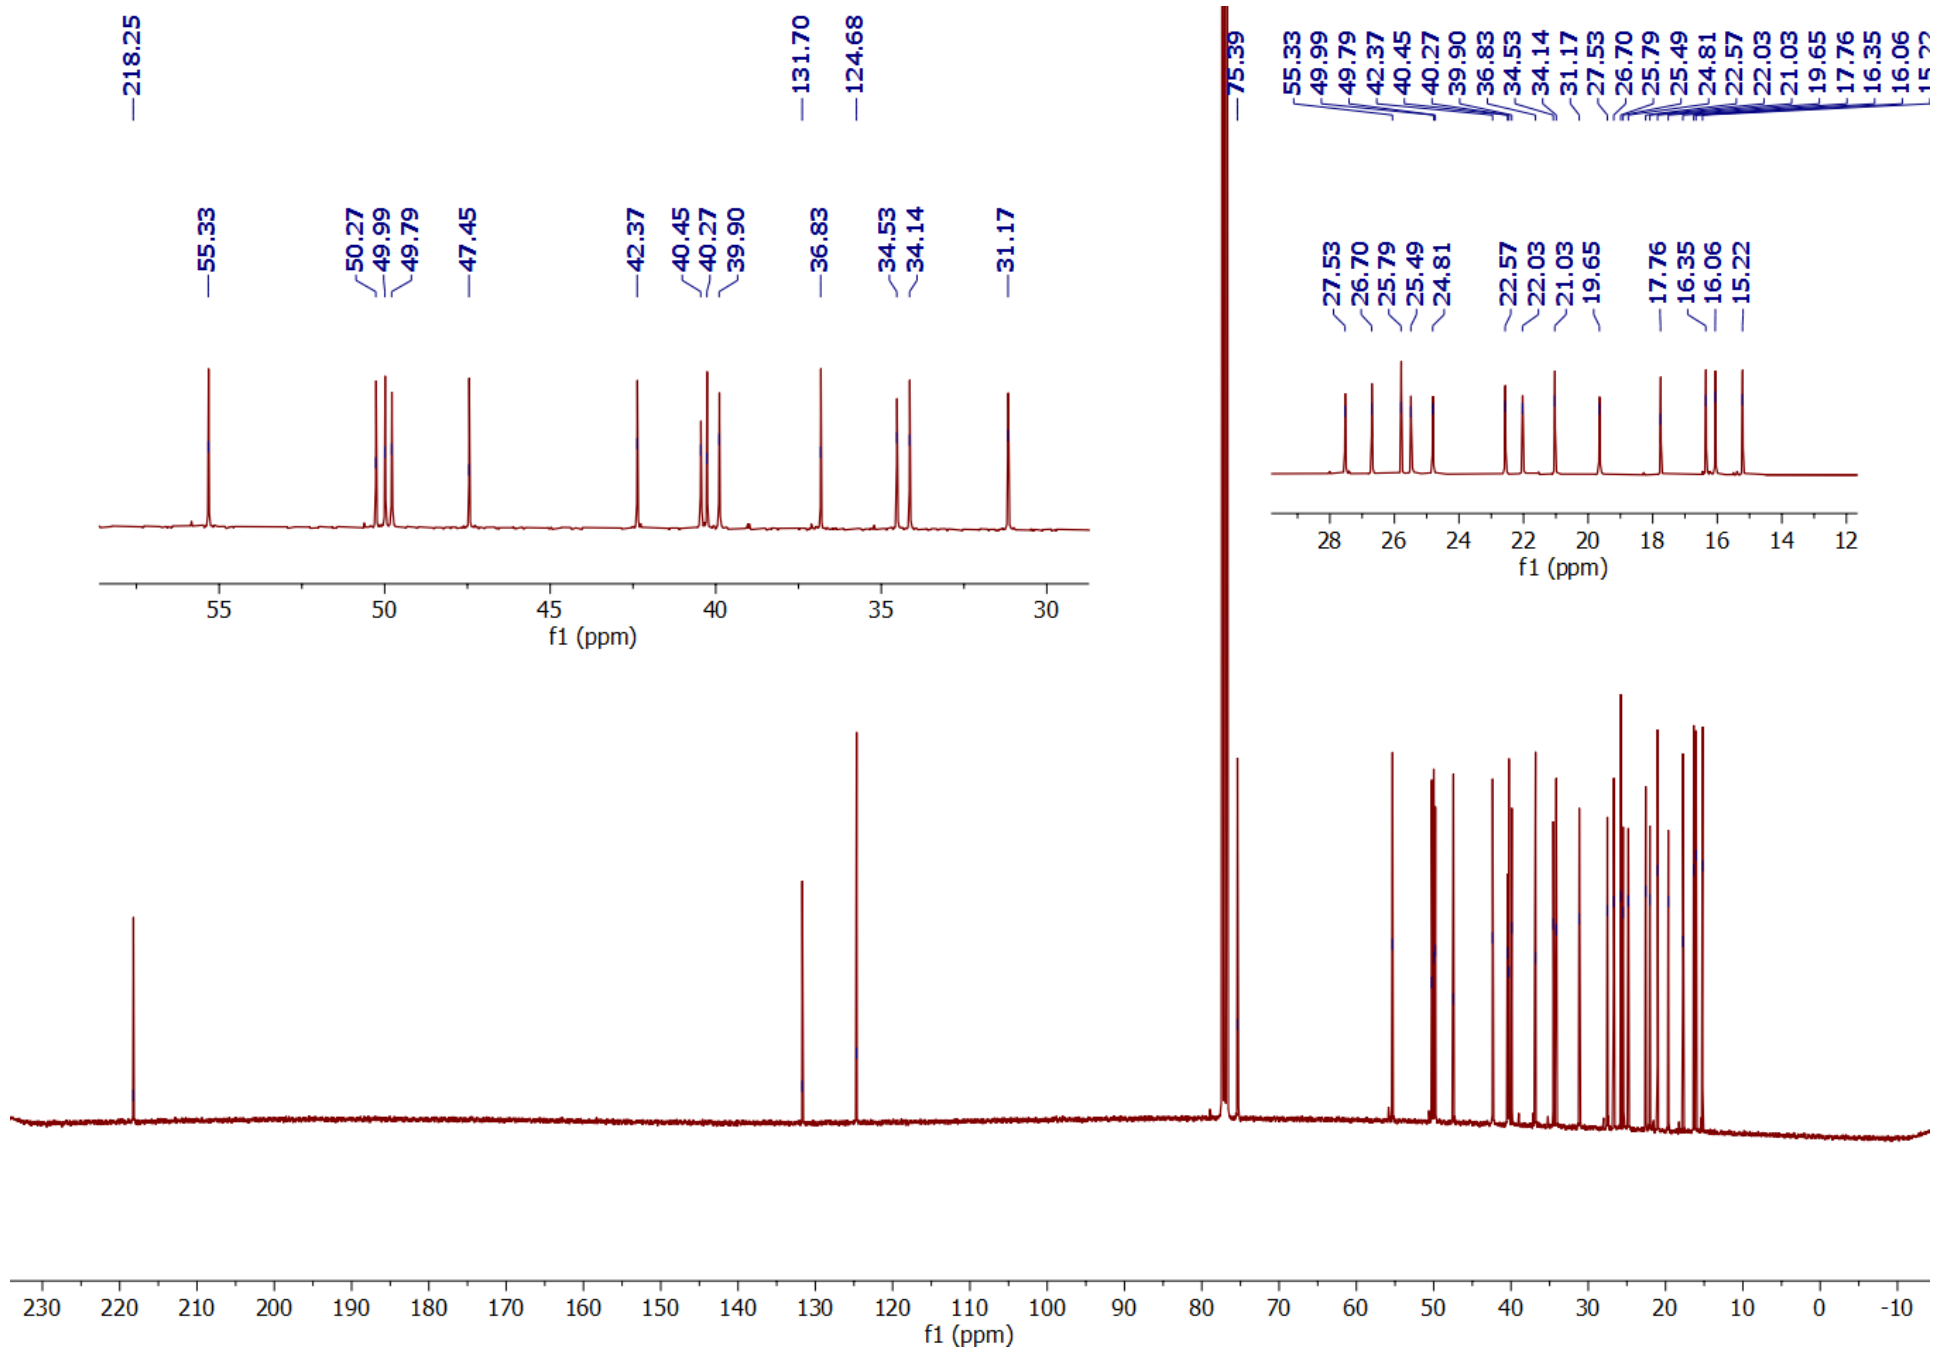

b.  $^1\text{H}/^{13}\text{C}$  NMR and COSY spectra of oxime **1**

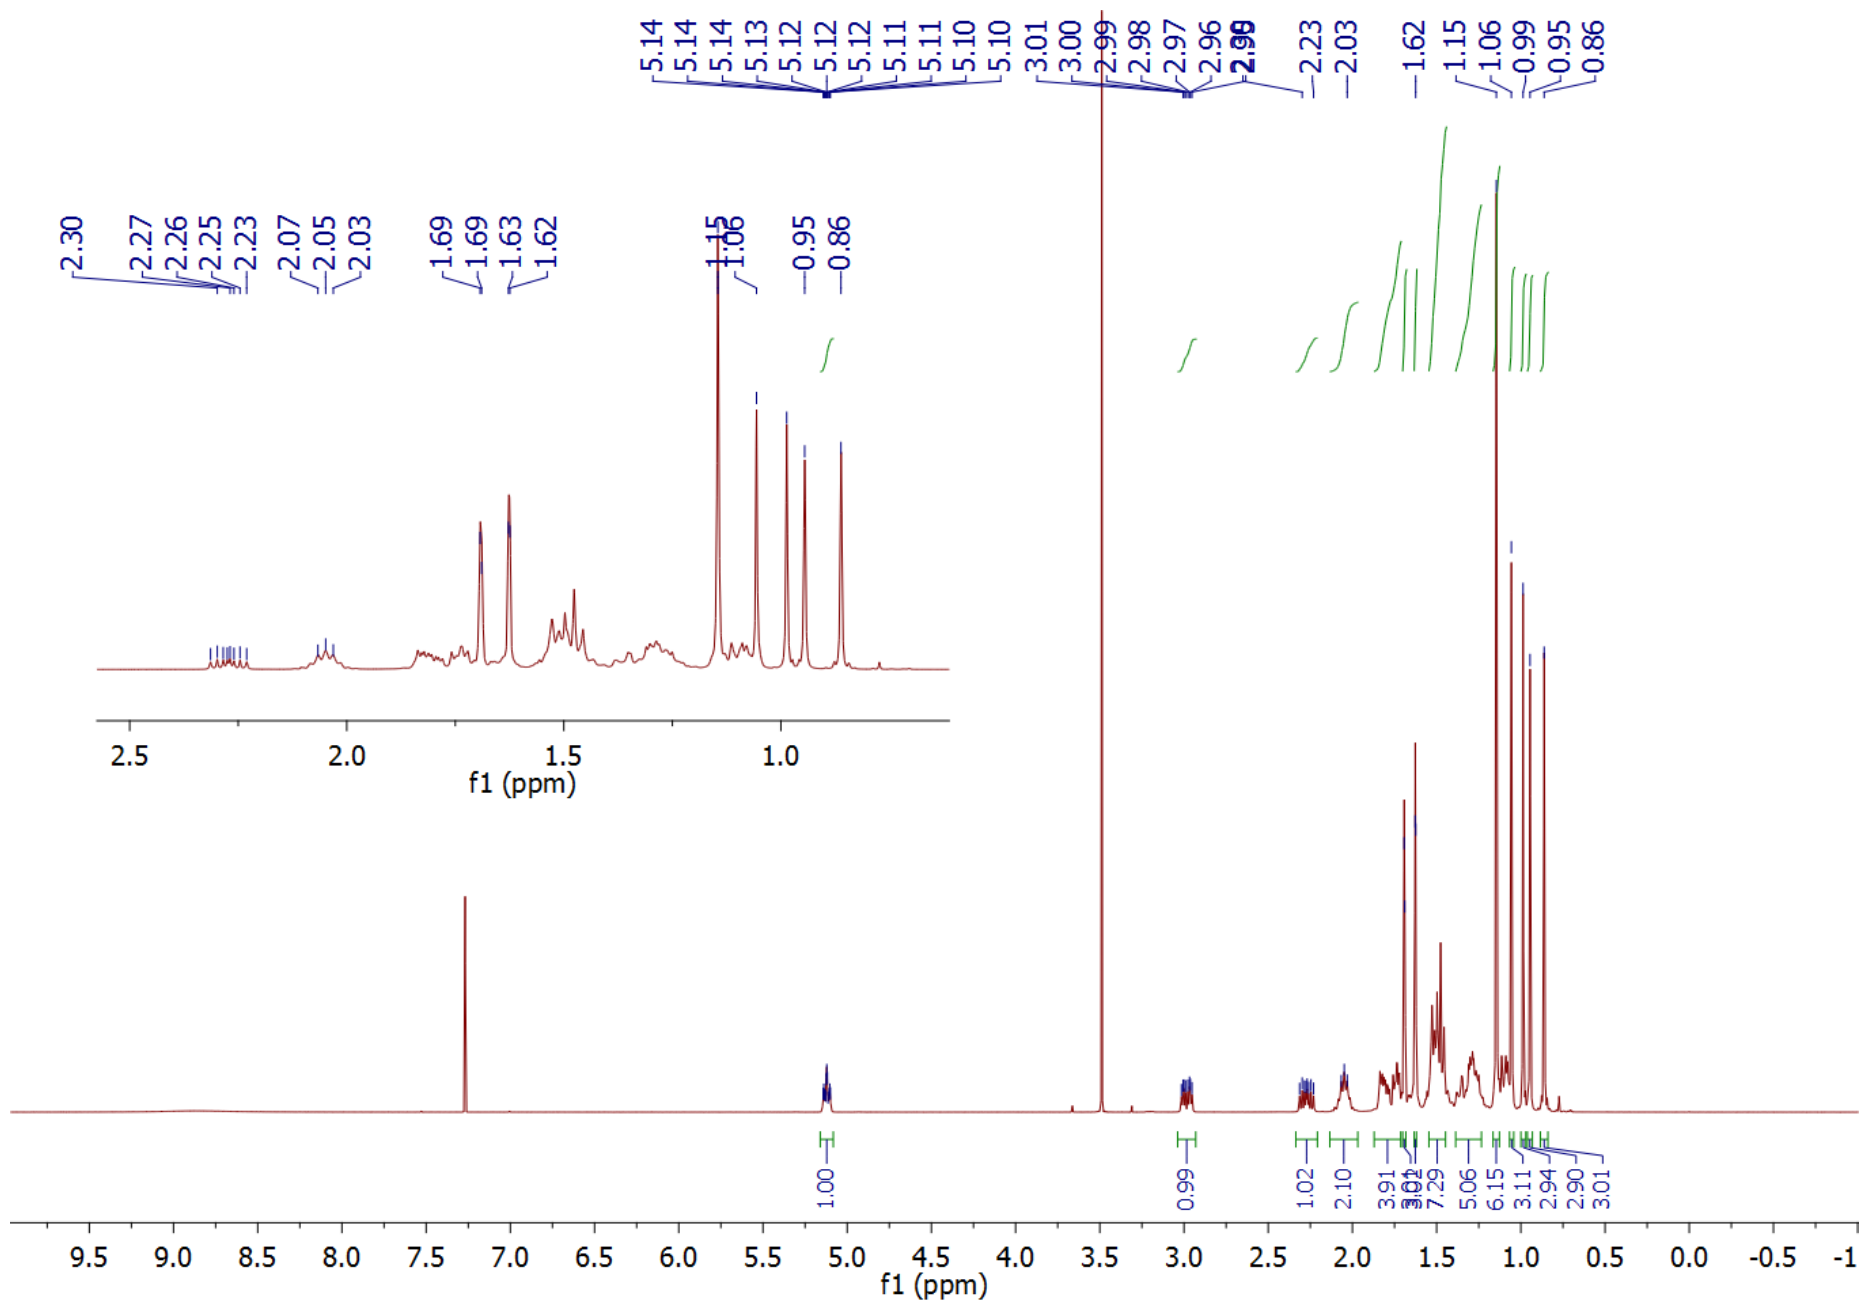

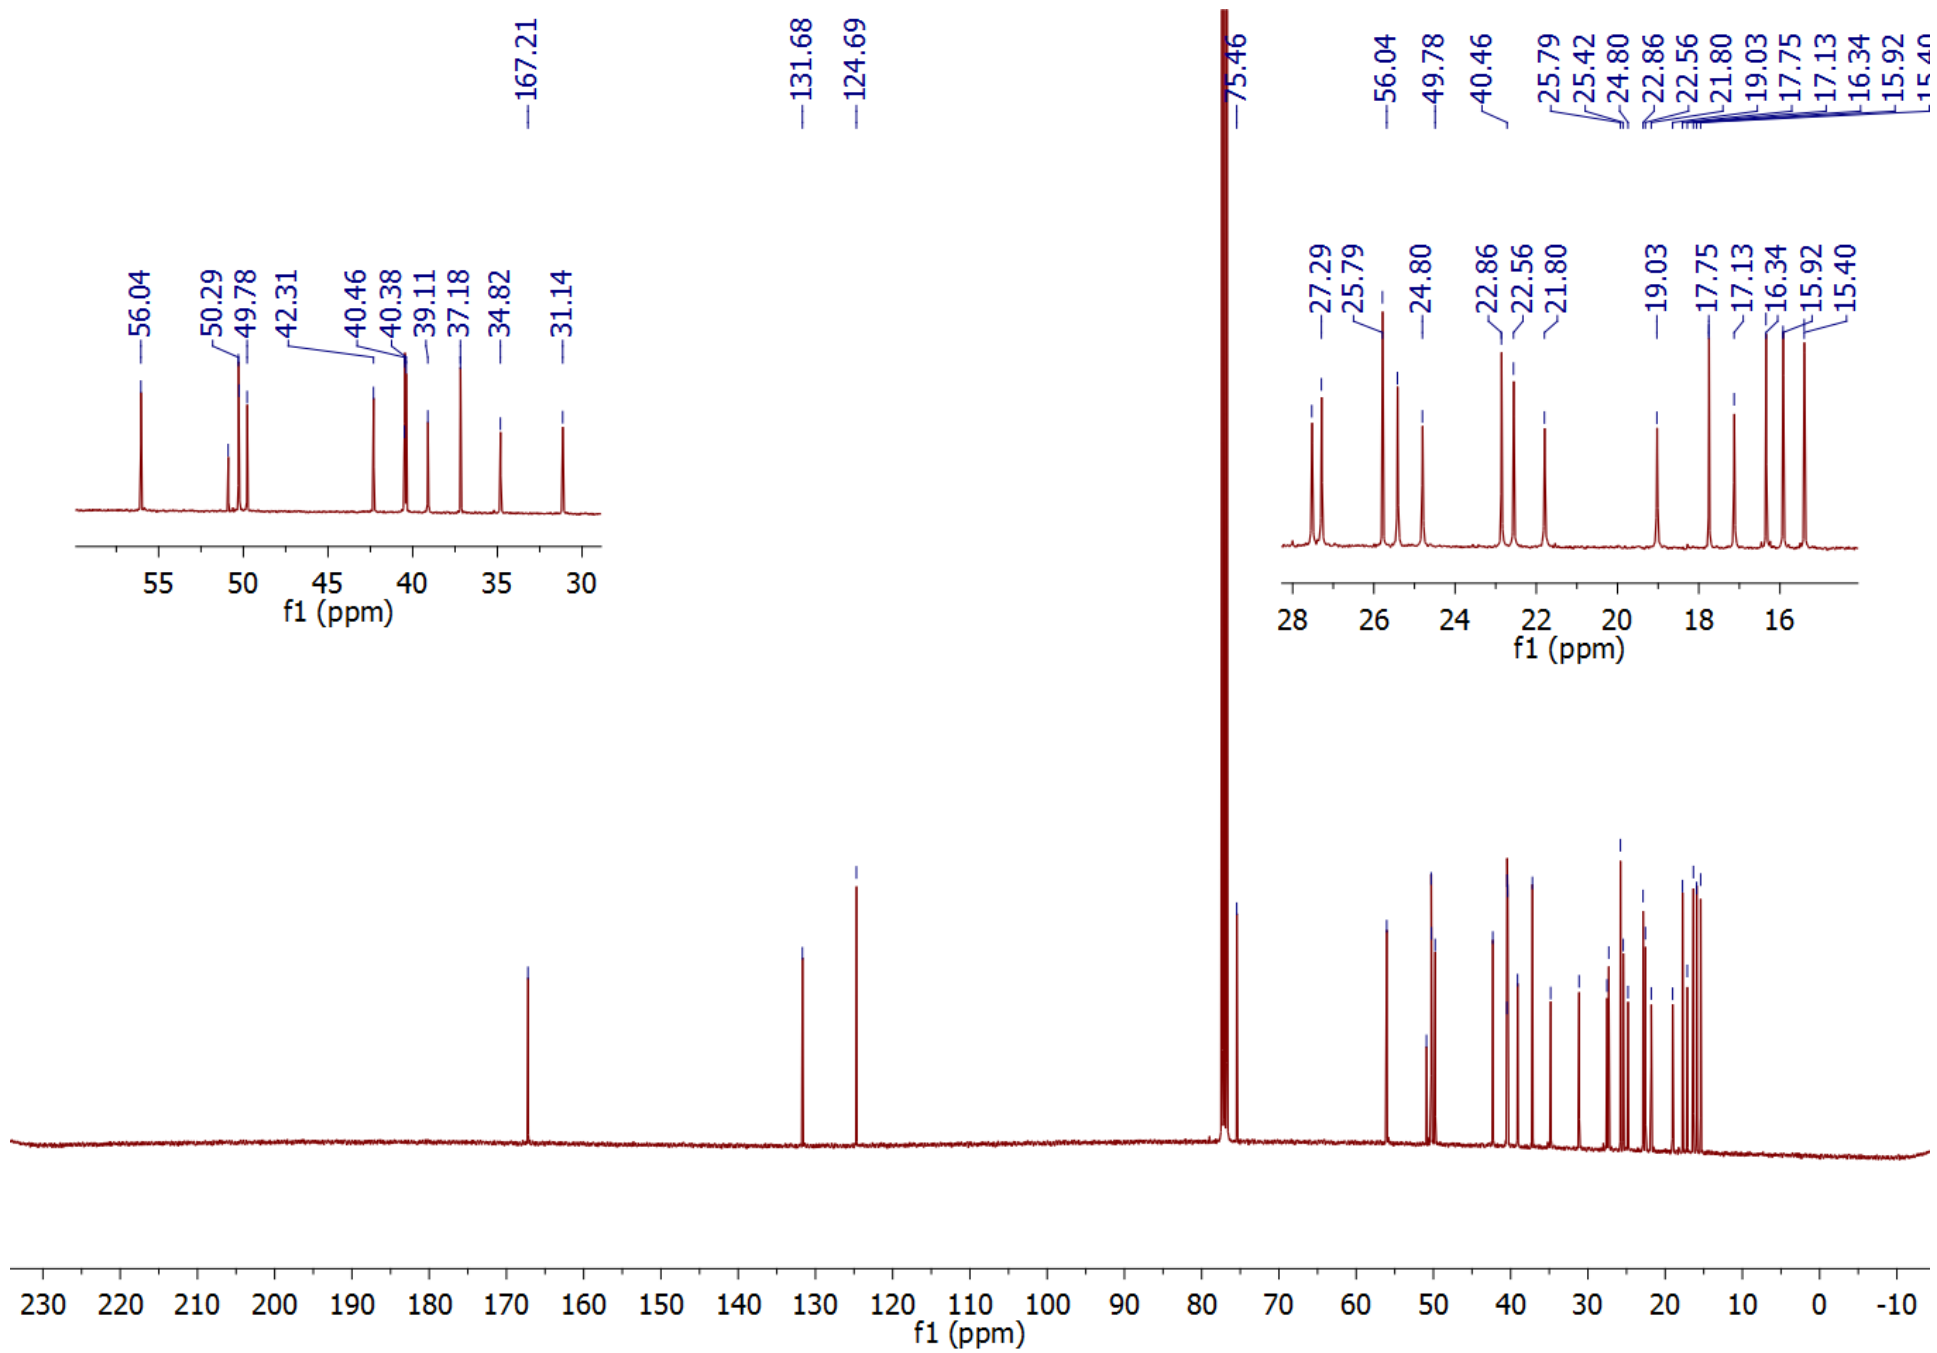

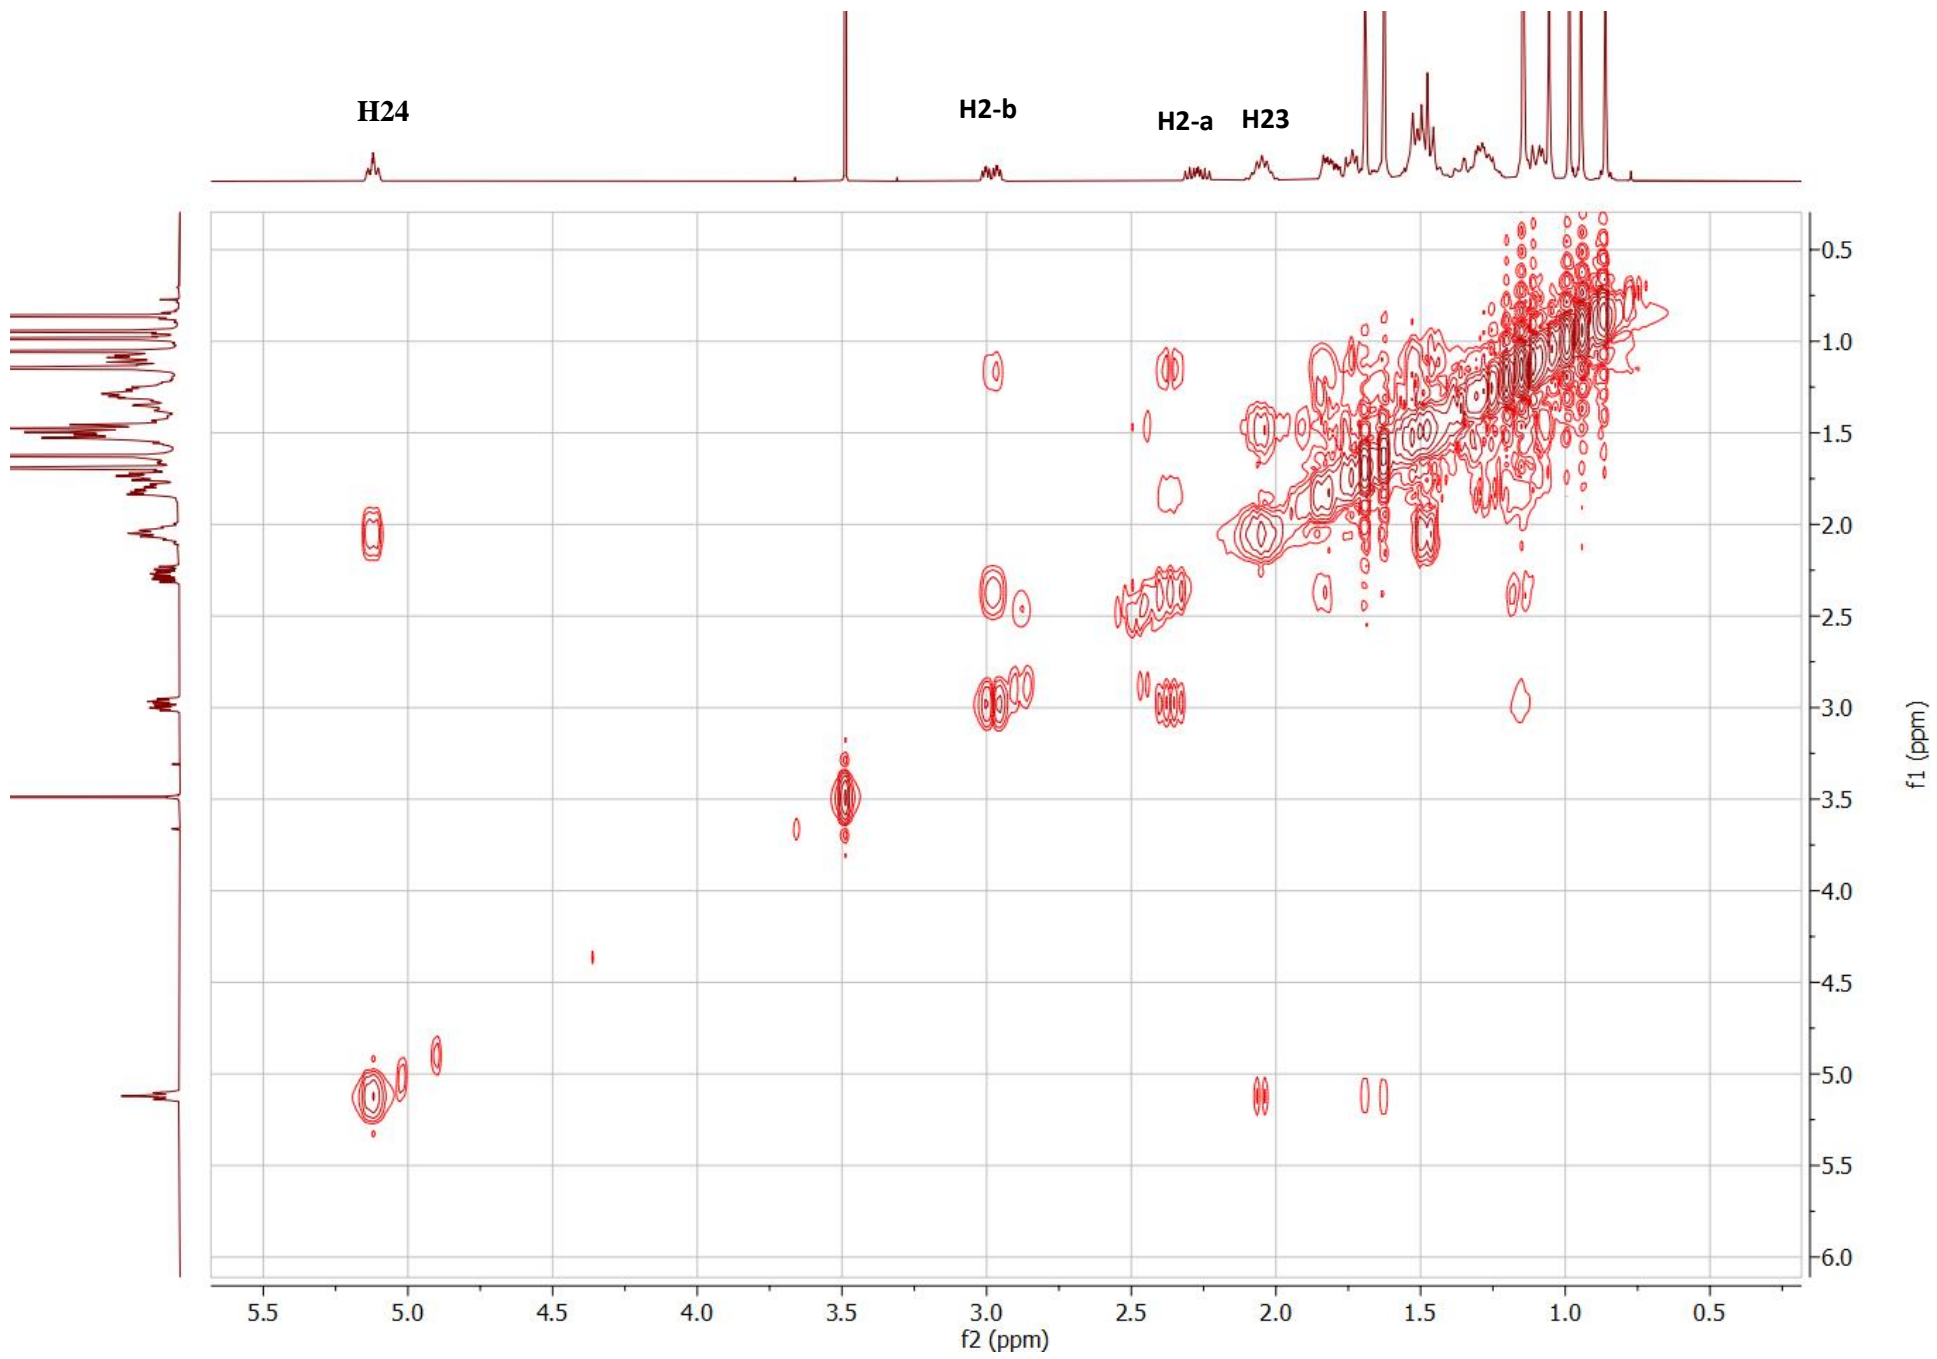



4. Cartesian coordinates of conformers for oxime 1 optimized at the level PCM(CHCl<sub>3</sub>)/B3LYP/6-31G(d,p)

**Conformer 1:** E = -1379.10108537 Hartree

|   |         |         |         |
|---|---------|---------|---------|
| C | -2.6764 | -3.382  | 0.5594  |
| C | -2.4374 | -2.5823 | 1.8736  |
| C | -1.0508 | -2.9617 | 2.5465  |
| C | -2.4205 | -1.0063 | 1.5772  |
| C | -3.588  | -2.9616 | 2.8401  |
| C | -0.9418 | -4.4381 | 3.14    |
| C | 0.157   | -2.5088 | 1.6799  |
| C | -2.3877 | -0.1633 | 2.8964  |
| C | -1.2246 | -0.678  | 0.6389  |
| C | -3.5738 | -0.4285 | 0.7277  |
| C | -3.5081 | -4.3896 | 3.3925  |
| C | -0.8462 | -5.5028 | 2.0225  |
| C | -2.1661 | -4.641  | 4.1146  |
| C | 0.3531  | -4.5335 | 4.0045  |
| C | 0.1107  | -1.0241 | 1.2811  |
| C | -1.466  | 0.7825  | 0.1988  |
| C | -3.0113 | 0.8631  | 0.0992  |
| C | -2.142  | -5.933  | 5.0083  |
| C | 0.4674  | -5.7987 | 4.8486  |
| C | -0.6955 | 1.2897  | -1.0602 |
| C | -3.2611 | -5.843  | 6.0816  |
| C | -2.3661 | -7.2506 | 4.2506  |
| C | -0.7647 | -5.9999 | 5.7132  |
| C | -0.8602 | 0.3485  | -2.2829 |
| C | -1.12   | 2.7349  | -1.3698 |
| O | 0.6887  | 1.3324  | -0.6861 |
| N | -0.719  | -6.2852 | 6.9839  |
| C | -0.3558 | 0.8558  | -3.6472 |
| C | 1.1417  | 0.9599  | -3.746  |
| C | 1.8852  | 2.0206  | -4.1181 |
| C | 3.3905  | 1.9251  | -4.1459 |
| C | 1.3509  | 3.3611  | -4.5431 |
| O | 0.5864  | -6.3593 | 7.4741  |
| H | -1.8596 | -3.2868 | -0.1589 |
| H | -2.8121 | -4.4483 | 0.7294  |

|   |         |         |         |
|---|---------|---------|---------|
| H | -3.5994 | -3.0769 | 0.0598  |
| H | -0.9797 | -2.338  | 3.4467  |
| H | -3.5933 | -2.3018 | 3.7127  |
| H | -4.5576 | -2.8195 | 2.3465  |
| H | 1.0963  | -2.6668 | 2.2188  |
| H | 0.2223  | -3.107  | 0.7658  |
| H | -3.3141 | -0.2822 | 3.4667  |
| H | -1.554  | -0.4151 | 3.5537  |
| H | -2.3094 | 0.9124  | 2.7137  |
| H | -1.3113 | -1.2932 | -0.2623 |
| H | -4.4788 | -0.2312 | 1.3119  |
| H | -3.8623 | -1.0884 | -0.0936 |
| H | -4.3461 | -4.4963 | 4.0877  |
| H | -3.6841 | -5.1256 | 2.604   |
| H | -0.3917 | -5.1092 | 1.1105  |
| H | -0.2197 | -6.3536 | 2.3007  |
| H | -1.8164 | -5.923  | 1.7529  |
| H | -2.0801 | -3.8176 | 4.8446  |
| H | 1.2421  | -4.4816 | 3.3651  |
| H | 0.4024  | -3.6694 | 4.6808  |
| H | 0.2974  | -0.397  | 2.1599  |
| H | 0.9319  | -0.8324 | 0.5826  |
| H | -1.1429 | 1.4295  | 1.0267  |
| H | -3.3754 | 0.9586  | -0.9281 |
| H | -3.3711 | 1.7422  | 0.6466  |
| H | 1.3743  | -5.7145 | 5.4537  |
| H | 0.5977  | -6.6916 | 4.2309  |
| H | -3.1964 | -6.6645 | 6.8054  |
| H | -4.2604 | -5.9092 | 5.6406  |
| H | -3.1955 | -4.9061 | 6.6464  |
| H | -3.2809 | -7.2222 | 3.6505  |
| H | -1.5348 | -7.5156 | 3.5961  |
| H | -2.4635 | -8.0875 | 4.9535  |
| H | -1.9218 | 0.1069  | -2.4118 |
| H | -0.3431 | -0.5981 | -2.0794 |
| H | -0.4371 | 3.2128  | -2.0791 |
| H | -1.0794 | 3.3522  | -0.4645 |

|   |         |         |         |
|---|---------|---------|---------|
| H | -2.1338 | 2.7881  | -1.7774 |
| H | 1.185   | 1.7493  | -1.4123 |
| H | -0.8646 | 1.7866  | -3.9065 |
| H | -0.6715 | 0.1283  | -4.4067 |
| H | 1.6622  | 0.0369  | -3.4839 |
| H | 3.8288  | 2.6716  | -3.4753 |
| H | 3.7515  | 0.9413  | -3.8282 |
| H | 3.7634  | 2.1048  | -5.1596 |
| H | 1.6835  | 4.1356  | -3.8441 |
| H | 1.7241  | 3.6147  | -5.5412 |
| H | 0.2612  | 3.4035  | -4.5888 |
| H | 0.4468  | -6.5725 | 8.4162  |

**Conformer 2:** E = -1379.10021687 Hartree

|   |         |         |         |
|---|---------|---------|---------|
| C | -1.9976 | -3.4932 | 0.4915  |
| C | -2.0803 | -2.6831 | 1.8176  |
| C | -0.8474 | -2.9827 | 2.7704  |
| C | -2.092  | -1.1113 | 1.5096  |
| C | -3.3821 | -3.1249 | 2.5326  |
| C | -0.7739 | -4.4547 | 3.376   |
| C | 0.4835  | -2.4361 | 2.1862  |
| C | -2.3784 | -0.2669 | 2.799   |
| C | -0.7503 | -0.7092 | 0.8273  |
| C | -3.079  | -0.6077 | 0.442   |
| C | -3.3392 | -4.5485 | 3.1023  |
| C | -0.3892 | -5.4993 | 2.3032  |
| C | -2.1581 | -4.7356 | 4.0804  |
| C | 0.32    | -4.4848 | 4.4873  |
| C | 0.4137  | -0.951  | 1.786   |
| C | -0.981  | 0.727   | 0.2859  |
| C | -2.5175 | 0.7559  | 0.0126  |
| C | -2.2428 | -6.0347 | 4.9601  |
| C | 0.3324  | -5.7506 | 5.3382  |
| C | -0.1565 | 1.1531  | -0.9792 |
| C | -3.5607 | -6.0209 | 5.7815  |
| C | -2.2306 | -7.3538 | 4.1726  |
| C | -1.0367 | -6.0326 | 5.9318  |

|   |         |         |         |                     |                                   |         |         |   |         |         |         |
|---|---------|---------|---------|---------------------|-----------------------------------|---------|---------|---|---------|---------|---------|
| C | -0.4804 | 2.6419  | -1.3099 | H                   | -3.0028                           | -7.37   | 3.3973  | C | -1.902  | -7.3593 | 3.7198  |
| C | 1.3481  | 0.9448  | -0.7819 | H                   | -1.2687                           | -7.5639 | 3.7031  | C | -0.96   | -6.0446 | 5.6307  |
| O | -0.5655 | 0.3113  | -2.0627 | H                   | -2.4219                           | -8.2031 | 4.8406  | C | 0.0084  | 0.9937  | -1.7452 |
| N | -1.2349 | -6.3324 | 7.1844  | H                   | -0.3153                           | 3.2395  | -0.4031 | C | -0.8279 | 3.2055  | -0.7759 |
| C | 0.3036  | 3.3279  | -2.4441 | H                   | -1.5455                           | 2.738   | -1.5543 | O | 0.9584  | 1.9806  | 0.2226  |
| C | 0.016   | 2.7747  | -3.8126 | H                   | 1.9218                            | 1.2812  | -1.6504 | N | -1.2026 | -6.4439 | 6.8472  |
| C | 0.8886  | 2.3101  | -4.7286 | H                   | 1.5903                            | -0.1192 | -0.7014 | C | 0.9181  | 1.7141  | -2.751  |
| C | 0.3954  | 1.7834  | -6.0535 | H                   | 1.718                             | 1.4747  | 0.101   | C | 1.261   | 0.815   | -3.9107 |
| C | 2.3839  | 2.2624  | -4.5713 | H                   | -0.0049                           | 0.5161  | -2.8315 | C | 0.7357  | 0.8323  | -5.1516 |
| O | -0.055  | -6.3396 | 7.9311  | H                   | 1.3687                            | 3.3398  | -2.2052 | C | 1.2262  | -0.1261 | -6.2062 |
| H | -1.0496 | -3.3619 | -0.0343 | H                   | 0.0009                            | 4.3835  | -2.461  | C | -0.3603 | 1.753   | -5.6142 |
| H | -2.1227 | -4.5643 | 0.6378  | H                   | -1.0456                           | 2.7677  | -4.0666 | O | -0.0763 | -6.3829 | 7.6704  |
| H | -2.8037 | -3.2283 | -0.1977 | H                   | 0.697                             | 0.7385  | -6.1804 | H | -0.8992 | -2.961  | -0.1589 |
| H | -1.0093 | -2.3703 | 3.666   | H                   | -0.6954                           | 1.8266  | -6.139  | H | -1.8524 | -4.3235 | 0.3704  |
| H | -3.6002 | -2.4633 | 3.377   | H                   | 0.817                             | 2.3707  | -6.8758 | H | -2.6459 | -3.018  | -0.4138 |
| H | -4.2364 | -3.0366 | 1.8497  | H                   | 2.8653                            | 2.8027  | -5.3935 | H | -1.1598 | -2.2467 | 3.5959  |
| H | 1.2906  | -2.5328 | 2.919   | H                   | 2.7409                            | 2.7101  | -3.6423 | H | -3.7216 | -2.6019 | 3.138   |
| H | 0.7898  | -3.0165 | 1.3103  | H                   | 2.7297                            | 1.2237  | -4.5926 | H | -4.1984 | -3.1163 | 1.5341  |
| H | -3.4241 | -0.367  | 3.1093  | H                   | -0.371                            | -6.576  | 8.8238  | H | 1.1905  | -2.1622 | 2.9681  |
| H | -1.7558 | -0.5393 | 3.652   |                     |                                   |         |         | H | 0.8114  | -2.5801 | 1.3096  |
| H | -2.2153 | 0.8047  | 2.6509  | <b>Conformer 3:</b> | <b>E = -1379.10008163 Hartree</b> |         |         | H | -2.0429 | -0.4414 | 3.6446  |
| H | -0.5801 | -1.3389 | -0.054  | C                   | -1.8495                           | -3.2374 | 0.3021  | H | -2.7553 | 0.8409  | 2.7028  |
| H | -4.1075 | -0.525  | 0.8083  | C                   | -2.0949                           | -2.5411 | 1.6728  | H | -3.7163 | -0.5492 | 3.0865  |
| H | -3.1008 | -1.2457 | -0.4451 | C                   | -0.891                            | -2.7852 | 2.6781  | H | -0.6706 | -0.9108 | 0.0004  |
| H | -4.2929 | -4.7009 | 3.6164  | C                   | -2.254                            | -0.9573 | 1.4777  | H | -4.2668 | -0.4542 | 0.7007  |
| H | -3.315  | -5.2903 | 2.2999  | C                   | -3.3822                           | -3.168  | 2.2656  | H | -3.1746 | -1.0806 | -0.5262 |
| H | 0.215   | -5.0676 | 1.5018  | C                   | -0.7058                           | -4.2819 | 3.1975  | H | -4.1845 | -4.9057 | 3.1731  |
| H | 0.2198  | -6.3135 | 2.7035  | C                   | 0.413                             | -2.0868 | 2.2016  | H | -3.0649 | -5.2915 | 1.895   |
| H | -1.2574 | -5.9749 | 1.8444  | C                   | -2.7044                           | -0.2476 | 2.7988  | H | 0.4578  | -4.672  | 1.3629  |
| H | -2.2687 | -3.9174 | 4.813   | C                   | -0.9223                           | -0.3773 | 0.9221  | H | 0.5084  | -5.9887 | 2.4846  |
| H | 1.3162  | -4.3749 | 4.0431  | C                   | -3.2207                           | -0.4677 | 0.3769  | H | -0.9362 | -5.7344 | 1.5448  |
| H | 0.1794  | -3.6267 | 5.1584  | C                   | -3.2219                           | -4.617  | 2.7405  | H | -2.3351 | -3.9931 | 4.5569  |
| H | 0.3203  | -0.3284 | 2.6826  | C                   | -0.1511                           | -5.2107 | 2.0924  | H | 1.3203  | -4.0405 | 4.0089  |
| H | 1.3701  | -0.678  | 1.3356  | C                   | -2.0936                           | -4.7465 | 3.7873  | H | 0.0458  | -3.4845 | 5.0871  |
| H | -0.751  | 1.4414  | 1.0879  | C                   | 0.3152                            | -4.2777 | 4.3767  | H | 0.0813  | -0.0315 | 2.8145  |
| H | -2.7793 | 0.9425  | -1.0336 | C                   | 0.2351                            | -0.592  | 1.8858  | H | 1.1688  | -0.2209 | 1.4505  |
| H | -2.9773 | 1.5615  | 0.5974  | C                   | -1.2701                           | 1.0696  | 0.5126  | H | -1.2853 | 1.6722  | 1.4315  |
| H | 1.0894  | -5.6208 | 6.1166  | C                   | -2.7265                           | 0.9433  | -0.0035 | H | -2.8166 | 1.084   | -1.0847 |
| H | 0.6389  | -6.6276 | 4.7614  | C                   | -2.0974                           | -6.1023 | 4.5812  | H | -3.3535 | 1.7081  | 0.4696  |
| H | -3.5981 | -6.8459 | 6.5032  | C                   | 0.4064                            | -5.59   | 5.1488  | H | 1.0972  | -5.4381 | 5.9827  |
| H | -4.4431 | -6.1382 | 5.145   | C                   | -0.2922                           | 1.7986  | -0.4584 | H | 0.836   | -6.392  | 4.5422  |
| H | -3.6662 | -5.0886 | 6.3479  | C                   | -3.4574                           | -6.2727 | 5.3117  | H | -3.4537 | -7.1431 | 5.9789  |

|   |         |         |         |
|---|---------|---------|---------|
| H | -4.283  | -6.4341 | 4.6118  |
| H | -3.6922 | -5.3946 | 5.9241  |
| H | -2.6204 | -7.401  | 2.8952  |
| H | -0.8971 | -7.4419 | 3.3036  |
| H | -2.0447 | -8.2654 | 4.3221  |
| H | -0.9265 | 0.72    | -2.2479 |
| H | 0.5145  | 0.0593  | -1.4719 |
| H | -0.0544 | 3.8362  | -1.2277 |
| H | -1.1279 | 3.7229  | 0.143   |
| H | -1.6905 | 3.1743  | -1.4484 |
| H | 0.7874  | 2.4967  | 1.0298  |
| H | 1.8561  | 2.0121  | -2.2672 |
| H | 0.4525  | 2.6383  | -3.1032 |
| H | 2.041   | 0.0868  | -3.6863 |
| H | 2.027   | -0.7758 | -5.8377 |
| H | 0.407   | -0.7682 | -6.5461 |
| H | 1.6165  | 0.4265  | -7.0671 |
| H | -0.7993 | 2.3437  | -4.8069 |
| H | 0.024   | 2.4456  | -6.37   |
| H | -1.1749 | 1.1727  | -6.0609 |
| H | -0.4205 | -6.7072 | 8.5241  |

**Conformer 4:** E = -1379.09979053 Hartree

|   |         |         |         |
|---|---------|---------|---------|
| C | -2.5928 | -3.4247 | 0.7283  |
| C | -2.4953 | -2.4937 | 1.9716  |
| C | -1.1445 | -2.7158 | 2.7686  |
| C | -2.5439 | -0.954  | 1.5218  |
| C | -3.6839 | -2.851  | 2.9004  |
| C | -0.9786 | -4.0944 | 3.5398  |
| C | 0.0939  | -2.2904 | 1.9341  |
| C | -2.6634 | 0.0107  | 2.7492  |
| C | -1.2983 | -0.6394 | 0.6432  |
| C | -3.6573 | -0.5334 | 0.5371  |
| C | -3.5673 | -4.2315 | 3.5525  |
| C | -0.6348 | -5.2674 | 2.593   |
| C | -2.2779 | -4.3638 | 4.3866  |
| C | 0.2351  | -3.9534 | 4.5306  |
| C | 0.0046  | -0.8503 | 1.4021  |
| C | -1.5851 | 0.7574  | 0.0518  |
| C | -3.1188 | 0.7247  | -0.1763 |
| C | -2.2328 | -5.6709 | 5.2654  |
| C | 0.0772  | -4.6632 | 5.8734  |

|   |         |         |         |
|---|---------|---------|---------|
| C | -0.7419 | 1.2017  | -1.1839 |
| C | -3.0846 | -5.4688 | 6.5394  |
| C | -2.7758 | -6.9255 | 4.5503  |
| C | -0.7837 | -5.9014 | 5.7393  |
| C | -0.7399 | 0.1444  | -2.3197 |
| C | -1.2277 | 2.5792  | -1.6644 |
| O | 0.5991  | 1.3759  | -0.7046 |
| N | -0.3953 | -7.1092 | 6.0313  |
| C | -0.1496 | 0.56    | -3.6807 |
| C | 1.3413  | 0.7601  | -3.6661 |
| C | 2.0469  | 1.8326  | -4.0761 |
| C | 3.5517  | 1.8416  | -3.971  |
| C | 1.4693  | 3.0882  | -4.6702 |
| O | 0.9344  | -7.1519 | 6.456   |
| H | -1.7461 | -3.3283 | 0.0461  |
| H | -2.6539 | -4.4788 | 0.9869  |
| H | -3.5066 | -3.2405 | 0.1568  |
| H | -1.1805 | -1.9928 | 3.5933  |
| H | -3.7669 | -2.1318 | 3.7207  |
| H | -4.6275 | -2.7926 | 2.344   |
| H | 1.0078  | -2.3683 | 2.5326  |
| H | 0.2293  | -2.9638 | 1.0813  |
| H | -1.8592 | -0.1084 | 3.477   |
| H | -2.6541 | 1.067   | 2.4646  |
| H | -3.6152 | -0.1276 | 3.2713  |
| H | -1.2858 | -1.3358 | -0.2014 |
| H | -4.6146 | -0.3374 | 1.0316  |
| H | -3.8438 | -1.2866 | -0.232  |
| H | -4.4408 | -4.3645 | 4.2019  |
| H | -3.6335 | -5.0166 | 2.7947  |
| H | 0.1113  | -4.9876 | 1.8445  |
| H | -0.2    | -6.1124 | 3.1376  |
| H | -1.5026 | -5.6634 | 2.0682  |
| H | -2.3223 | -3.5255 | 5.1016  |
| H | 1.1529  | -4.3118 | 4.0454  |
| H | 0.4275  | -2.8977 | 4.7616  |
| H | 0.0958  | -0.1399 | 2.231   |
| H | 0.8622  | -0.6749 | 0.7444  |
| H | -1.3717 | 1.4945  | 0.8388  |
| H | -3.3984 | 0.6928  | -1.2337 |
| H | -3.5746 | 1.6281  | 0.2459  |
| H | -0.4223 | -3.9958 | 6.5861  |

|   |         |         |         |
|---|---------|---------|---------|
| H | 1.0629  | -4.8721 | 6.296   |
| H | -3.0154 | -6.3386 | 7.2035  |
| H | -4.142  | -5.319  | 6.2985  |
| H | -2.7458 | -4.6018 | 7.1176  |
| H | -3.8217 | -6.804  | 4.2506  |
| H | -2.1949 | -7.1837 | 3.6623  |
| H | -2.7462 | -7.8029 | 5.2079  |
| H | -1.7691 | -0.1811 | -2.5111 |
| H | -0.1853 | -0.7415 | -1.9843 |
| H | -0.5171 | 3.0378  | -2.3591 |
| H | -1.3049 | 3.2773  | -0.8225 |
| H | -2.2036 | 2.5232  | -2.1558 |
| H | 1.1296  | 1.7596  | -1.4247 |
| H | -0.6908 | 1.4252  | -4.0694 |
| H | -0.351  | -0.2539 | -4.3898 |
| H | 1.8933  | -0.0964 | -3.2746 |
| H | 3.8815  | 2.6744  | -3.3412 |
| H | 3.9443  | 0.9183  | -3.5321 |
| H | 4.0006  | 1.9552  | -4.9632 |
| H | 1.9134  | 3.2771  | -5.6535 |
| H | 0.3876  | 3.0487  | -4.8102 |
| H | 1.6886  | 3.944   | -4.0233 |
| H | 1.0703  | -8.1026 | 6.6299  |

**Conformer 5:** E = -1379.09916033 Hartree

|   |         |         |         |
|---|---------|---------|---------|
| C | -3.3668 | -3.2752 | 0.7819  |
| C | -2.4634 | -2.4616 | 1.7539  |
| C | -1.1047 | -3.2185 | 2.0667  |
| C | -2.0954 | -1.0376 | 1.1158  |
| C | -3.2615 | -2.298  | 3.0724  |
| C | -1.2309 | -4.562  | 2.9159  |
| C | -0.1938 | -3.3118 | 0.8128  |
| C | -1.3646 | -0.1091 | 2.1443  |
| C | -1.2576 | -1.2532 | -0.1794 |
| C | -3.2556 | -0.2056 | 0.5314  |
| C | -3.4152 | -3.5895 | 3.8848  |
| C | -1.8438 | -5.7131 | 2.0851  |
| C | -2.0425 | -4.2118 | 4.2232  |
| C | 0.1954  | -5.0038 | 3.3668  |
| C | 0.0566  | -1.956  | 0.1301  |
| C | -1.2204 | 0.1335  | -0.86   |
| C | -2.59   | 0.7621  | -0.462  |

|   |         |         |         |                     |                    |         |         |   |         |         |         |
|---|---------|---------|---------|---------------------|--------------------|---------|---------|---|---------|---------|---------|
| C | -2.0886 | -5.3206 | 5.3355  | H                   | -2.4202            | 1.7361  | 0.0132  | C | -1.3216 | 1.0776  | 0.5666  |
| C | 0.2209  | -6.1247 | 4.4011  | H                   | 1.2637             | -6.2939 | 4.683   | C | -2.7662 | 0.9278  | 0.0235  |
| C | -0.9413 | 0.1969  | -2.3917 | H                   | -0.1379            | -7.071  | 3.9869  | C | -2.0914 | -6.1394 | 4.5675  |
| C | -2.6871 | -4.7244 | 6.6387  | H                   | -2.6188            | -5.4292 | 7.4762  | C | 0.394   | -5.5896 | 5.1793  |
| C | -2.9361 | -6.5539 | 4.988   | H                   | -3.7499            | -4.4865 | 6.532   | C | -0.3388 | 1.8332  | -0.3793 |
| C | -0.636  | -5.7838 | 5.6076  | H                   | -2.1585            | -3.812  | 6.9376  | C | -3.4599 | -6.3372 | 5.2748  |
| C | 0.5065  | -0.1678 | -2.8155 | H                   | -3.9513            | -6.2763 | 4.6879  | C | -1.8615 | -7.3867 | 3.7004  |
| C | -1.9007 | -0.6849 | -3.2119 | H                   | -2.4997            | -7.165  | 4.1967  | C | -0.9719 | -6.0711 | 5.6355  |
| O | -1.2032 | 1.5407  | -2.8334 | H                   | -3.0234            | -7.2187 | 5.8566  | C | 0.0191  | 1.025   | -1.6513 |
| N | -0.2377 | -5.9213 | 6.8407  | H                   | 0.6284             | 0.0829  | -3.8793 | C | -0.9103 | 3.2231  | -0.7097 |
| C | 1.6723  | 0.4867  | -2.0532 | H                   | 0.6382             | -1.2541 | -2.7519 | O | 0.8672  | 2.0454  | 0.3711  |
| C | 1.7815  | 1.9738  | -2.2481 | H                   | -1.776             | -0.4928 | -4.2847 | N | -1.2269 | -6.485  | 6.8446  |
| C | 1.81    | 2.9413  | -1.31   | H                   | -2.9494            | -0.4647 | -2.9902 | C | 0.8636  | 1.7785  | -2.6887 |
| C | 1.9171  | 4.3911  | -1.713  | H                   | -1.7282            | -1.7521 | -3.0431 | C | 1.2525  | 0.8749  | -3.8291 |
| C | 1.752   | 2.7246  | 0.1778  | H                   | -0.6824            | 2.1434  | -2.2735 | C | 0.7358  | 0.8458  | -5.0734 |
| O | 1.0741  | -6.3905 | 6.9353  | H                   | 2.6037             | 0.0482  | -2.4352 | C | 1.2754  | -0.1113 | -6.1055 |
| H | -2.8618 | -3.5535 | -0.1453 | H                   | 1.6333             | 0.2056  | -1.0002 | C | -0.395  | 1.7082  | -5.5638 |
| H | -3.7379 | -4.2    | 1.219   | H                   | 1.8508             | 2.2728  | -3.2956 | O | -0.115  | -6.4121 | 7.6861  |
| H | -4.2756 | -2.7278 | 0.518   | H                   | 1.9529             | 4.5199  | -2.7999 | H | -0.8689 | -2.9416 | -0.1294 |
| H | -0.5497 | -2.5606 | 2.7473  | H                   | 1.053              | 4.9513  | -1.341  | H | -1.8068 | -4.3246 | 0.3737  |
| H | -2.7684 | -1.5803 | 3.7351  | H                   | 2.8268             | 4.8347  | -1.2954 | H | -2.6098 | -3.0269 | -0.4138 |
| H | -4.2558 | -1.884  | 2.8629  | H                   | 2.6185             | 3.1904  | 0.6592  | H | -1.2033 | -2.2613 | 3.6255  |
| H | 0.7851  | -3.7217 | 1.0799  | H                   | 0.8442             | 3.1801  | 0.5872  | H | -3.7515 | -2.657  | 3.1225  |
| H | -0.6226 | -3.9952 | 0.0732  | H                   | 1.7525             | 1.6726  | 0.4683  | H | -4.1924 | -3.1673 | 1.5071  |
| H | -2.0419 | 0.2015  | 2.9463  | H                   | 1.2133             | -6.4362 | 7.9002  | H | 1.1551  | -2.1326 | 3.0366  |
| H | -0.4907 | -0.5709 | 2.6061  |                     |                    |         |         | H | 0.8099  | -2.5442 | 1.3692  |
| H | -1.0037 | 0.8225  | 1.6991  |                     |                    |         |         | H | -2.1168 | -0.4709 | 3.6734  |
| H | -1.8151 | -1.9115 | -0.853  | <b>Conformer 6:</b> | E = -1379.09904181 | Hartree |         | H | -2.8379 | 0.8051  | 2.7296  |
| H | -3.8284 | 0.3299  | 1.2956  | C                   | -1.8217            | -3.2381 | 0.3136  | H | -3.7792 | -0.6048 | 3.0887  |
| H | -3.9644 | -0.814  | -0.0357 | C                   | -2.1018            | -2.5569 | 1.6854  | H | -0.6793 | -0.8879 | 0.0478  |
| H | -3.9498 | -3.3145 | 4.7988  | C                   | -0.9105            | -2.7884 | 2.7085  | H | -4.2937 | -0.4992 | 0.6955  |
| H | -4.0624 | -4.3027 | 3.3681  | C                   | -2.2851            | -0.9745 | 1.4998  | H | -3.1732 | -1.0995 | -0.5185 |
| H | -1.6431 | -5.6071 | 1.0165  | C                   | -3.3878            | -3.2105 | 2.2519  | H | -4.1748 | -4.9685 | 3.1332  |
| H | -1.4345 | -6.6911 | 2.3494  | C                   | -0.7083            | -4.2856 | 3.2198  | H | -3.0278 | -5.3254 | 1.8712  |
| H | -2.9242 | -5.7988 | 2.2115  | C                   | 0.3889             | -2.0645 | 2.2582  | H | 0.4914  | -4.6423 | 1.4017  |
| H | -1.4712 | -3.3936 | 4.6947  | C                   | -2.7686            | -0.283  | 2.8188  | H | 0.546   | -5.9664 | 2.5145  |
| H | 0.7809  | -5.3383 | 2.5025  | C                   | -0.955             | -0.3671 | 0.9702  | H | -0.8871 | -5.7294 | 1.5531  |
| H | 0.7261  | -4.1402 | 3.7899  | C                   | -3.2428            | -0.4934 | 0.3876  | H | -2.3644 | -4.0345 | 4.5541  |
| H | 0.6947  | -1.333  | 0.7664  | C                   | -3.2104            | -4.6601 | 2.7188  | H | 1.2997  | -4.016  | 4.0661  |
| H | 0.6214  | -2.1426 | -0.7863 | C                   | -0.12              | -5.1966 | 2.1173  | H | -0.0014 | -3.4902 | 5.1274  |
| H | -0.4585 | 0.75    | -0.3713 | C                   | -2.0974            | -4.778  | 3.7833  | H | 0.0132  | -0.0199 | 2.8809  |
| H | -3.2564 | 0.9445  | -1.31   | C                   | 0.293              | -4.2731 | 4.4156  | H | 1.1249  | -0.1811 | 1.5327  |
|   |         |         |         | C                   | 0.1908             | -0.5706 | 1.9506  |   |         |         |         |



|   |         |         |         |                                                |         |         |         |   |         |         |         |
|---|---------|---------|---------|------------------------------------------------|---------|---------|---------|---|---------|---------|---------|
| C | -0.1581 | -5.1532 | 2.9981  | H                                              | 0.9996  | -3.9874 | 4.8764  | C | -3.4189 | -4.4767 | 3.3844  |
| C | -2.3472 | -4.5462 | 4.2561  | H                                              | -0.0995 | -2.7193 | 5.349   | C | -0.6176 | -5.8059 | 2.5925  |
| C | -0.0594 | -3.7839 | 5.0847  | H                                              | -0.1993 | 0.0378  | 2.7881  | C | -2.1943 | -4.6162 | 4.3158  |
| C | 0.1033  | -0.6438 | 1.9855  | H                                              | 1.0822  | -0.2937 | 1.6527  | C | 0.3182  | -4.5339 | 4.5442  |
| C | -1.2205 | 0.7017  | 0.1242  | H                                              | -1.2138 | 1.5074  | 0.8707  | C | 0.5206  | -1.4863 | 1.3094  |
| C | -2.6829 | 0.4986  | -0.3842 | H                                              | -2.7853 | 0.5476  | -1.4728 | C | -0.8295 | 0.0614  | -0.3594 |
| C | -2.3561 | -5.8586 | 5.1281  | H                                              | -3.3246 | 1.2881  | 0.0248  | C | -2.3723 | 0.1887  | -0.5548 |
| C | -0.4728 | -4.5509 | 6.3389  | H                                              | -1.2396 | -3.9839 | 6.8808  | C | -2.3258 | -5.7489 | 5.3967  |
| C | -0.2548 | 1.1242  | -1.038  | H                                              | 0.3795  | -4.6299 | 7.0179  | C | 0.2833  | -5.6474 | 5.586   |
| C | -3.545  | -5.8171 | 6.115   | H                                              | -3.5359 | -6.6876 | 6.782   | C | -0.0542 | 0.2326  | -1.7109 |
| C | -2.4936 | -7.1564 | 4.3054  | H                                              | -4.5057 | -5.8119 | 5.59    | C | -3.5801 | -5.4873 | 6.2742  |
| C | -1.0751 | -5.8944 | 5.9859  | H                                              | -3.5072 | -4.9283 | 6.7548  | C | -2.474  | -7.1703 | 4.8328  |
| C | -0.6957 | 2.5214  | -1.5712 | H                                              | -3.4229 | -7.1767 | 3.7269  | C | -1.0612 | -5.7043 | 6.2898  |
| C | 1.2105  | 1.1391  | -0.5927 | H                                              | -1.6595 | -7.3033 | 3.6159  | C | -0.2209 | 1.6972  | -2.2058 |
| O | -0.3755 | 0.1447  | -2.0753 | H                                              | -2.5192 | -8.0394 | 4.9557  | C | 1.4304  | -0.1272 | -1.5896 |
| N | -0.6109 | -7.0426 | 6.3872  | H                                              | -0.7564 | 3.2115  | -0.7187 | O | -0.6204 | -0.6296 | -2.7054 |
| C | 0.1772  | 3.2078  | -2.6381 | H                                              | -1.7093 | 2.4506  | -1.9849 | N | -1.1987 | -5.7809 | 7.5834  |
| C | 0.1889  | 2.5059  | -3.9679 | H                                              | 1.8749  | 1.4764  | -1.3935 | C | 0.3686  | 1.9901  | -3.5924 |
| C | 1.2507  | 2.0916  | -4.6872 | H                                              | 1.5624  | 0.128   | -0.3665 | C | 0.0493  | 3.3975  | -4.0279 |
| C | 1.0506  | 1.392   | -6.0087 | H                                              | 1.3631  | 1.7858  | 0.2765  | C | 0.868   | 4.468   | -4.0286 |
| C | 2.6943  | 2.2662  | -4.3017 | H                                              | 0.2759  | 0.3564  | -2.7667 | C | 0.3856  | 5.8026  | -4.5362 |
| O | 0.5427  | -6.9081 | 7.1627  | H                                              | 1.1789  | 3.3844  | -2.2414 | C | 2.2893  | 4.4711  | -3.536  |
| H | -0.7719 | -3.3641 | 0.2417  | H                                              | -0.2431 | 4.2072  | -2.813  | O | 0.0241  | -5.7776 | 8.2576  |
| H | -1.7665 | -4.6394 | 0.8903  | H                                              | -0.8074 | 2.3302  | -4.3777 | H | -1.2548 | -4.0064 | -0.019  |
| H | -2.4834 | -3.5002 | -0.175  | H                                              | 1.4967  | 0.3925  | -5.9783 | H | -2.3772 | -4.9854 | 0.8925  |
| H | -1.4444 | -2.0314 | 3.7675  | H                                              | -0.0084 | 1.275   | -6.262  | H | -2.9986 | -3.7377 | -0.1097 |
| H | -3.8997 | -2.5208 | 3.1589  | H                                              | 1.5244  | 1.9615  | -6.8149 | H | -0.8857 | -2.4596 | 3.4661  |
| H | -4.2402 | -3.276  | 1.6136  | H                                              | 3.2322  | 2.7998  | -5.0926 | H | -3.4899 | -2.3593 | 3.3337  |
| H | 0.975   | -2.0155 | 3.3828  | H                                              | 2.8359  | 2.8331  | -3.3799 | H | -4.2712 | -3.1027 | 1.9541  |
| H | 0.7562  | -2.6848 | 1.7788  | H                                              | 3.166   | 1.2876  | -4.1642 | H | 1.338   | -2.9468 | 2.6337  |
| H | -3.9439 | -0.4543 | 2.6611  | H                                              | 0.7619  | -7.8345 | 7.3777  | H | 0.6921  | -3.6263 | 1.1525  |
| H | -2.3707 | -0.3221 | 3.4464  | <b>Conformer 9:</b> E = -1379.09863435 Hartree |         |         |         | H | -3.1612 | -0.3563 | 2.7259  |
| H | -2.8446 | 0.8322  | 2.2382  | C                                              | -2.1734 | -3.9662 | 0.5699  | H | -1.4796 | -0.5927 | 3.1991  |
| H | -0.5368 | -1.3148 | 0.072   | C                                              | -2.1004 | -2.9561 | 1.7515  | H | -1.8954 | 0.6164  | 2.0226  |
| H | -4.2238 | -0.8997 | 0.3042  | C                                              | -0.835  | -3.216  | 2.6731  | H | -0.6251 | -2.0624 | -0.3846 |
| H | -2.9501 | -1.5972 | -0.6936 | C                                              | -2.0038 | -1.4565 | 1.197   | H | -4.0064 | -0.8041 | 0.5161  |
| H | -4.3559 | -4.839  | 3.4871  | C                                              | -3.3833 | -3.1611 | 2.5961  | H | -3.1459 | -1.7982 | -0.657  |
| H | -3.1131 | -5.3437 | 2.3661  | C                                              | -0.8421 | -4.5765 | 3.5026  | H | -4.3454 | -4.4595 | 3.9663  |
| H | 0.7109  | -4.7444 | 2.4756  | C                                              | 0.4943  | -2.8912 | 1.9388  | H | -3.5092 | -5.3335 | 2.7118  |
| H | 0.2353  | -5.9386 | 3.6525  | C                                              | -2.134  | -0.4004 | 2.3482  | H | -1.5509 | -6.265  | 2.2627  |
| H | -0.7818 | -5.6601 | 2.2637  | C                                              | -0.682  | -1.2894 | 0.3893  | H | -0.035  | -5.5613 | 1.7012  |
| H | -2.7064 | -3.7438 | 4.9217  | C                                              | -3.0144 | -1.0357 | 0.1149  | H | -0.0524 | -6.6007 | 3.0853  |

|                                                 |         |         |         |   |         |         |         |                                                 |         |         |         |
|-------------------------------------------------|---------|---------|---------|---|---------|---------|---------|-------------------------------------------------|---------|---------|---------|
| H                                               | -2.1882 | -3.6871 | 4.9117  | C | -0.7176 | -1.442  | 0.1925  | H                                               | -0.2752 | -6.7039 | 3.029   |
| H                                               | 1.2878  | -4.587  | 4.0354  | C | -3.0418 | -1.0342 | 0.0619  | H                                               | -1.7967 | -6.2902 | 2.2887  |
| H                                               | 0.2946  | -3.5724 | 5.0748  | C | -3.4627 | -4.3431 | 3.4596  | H                                               | -2.0861 | -3.5931 | 4.8789  |
| H                                               | 0.5408  | -0.7261 | 2.0982  | C | -0.8152 | -5.8874 | 2.5437  | H                                               | 1.2575  | -4.7578 | 3.8206  |
| H                                               | 1.4627  | -1.3763 | 0.7682  | C | -2.1931 | -4.5376 | 4.318   | H                                               | 0.4031  | -3.6461 | 4.8836  |
| H                                               | -0.492  | 0.8625  | 0.3123  | C | 0.3283  | -4.6226 | 4.3864  | H                                               | 0.6652  | -0.9241 | 1.789   |
| H                                               | -2.6843 | 0.2382  | -1.6027 | C | 0.529   | -1.7051 | 1.0328  | H                                               | 1.4331  | -1.6889 | 0.4208  |
| H                                               | -2.7251 | 1.1128  | -0.0815 | C | -0.8219 | -0.1    | -0.5795 | H                                               | -0.4089 | 0.6906  | 0.0585  |
| H                                               | 1.0997  | -5.4692 | 6.2913  | C | -2.3611 | 0.108   | -0.7087 | H                                               | -2.7204 | 0.1082  | -1.7424 |
| H                                               | 0.4756  | -6.6282 | 5.1423  | C | -2.3307 | -5.6242 | 5.4444  | H                                               | -2.6367 | 1.0787  | -0.2797 |
| H                                               | -3.6362 | -6.1832 | 7.1201  | C | 0.2865  | -5.6987 | 5.4665  | H                                               | 1.1565  | -5.5549 | 6.1131  |
| H                                               | -4.5098 | -5.6211 | 5.7127  | C | -0.1048 | -0.0254 | -1.9632 | H                                               | 0.3846  | -6.7035 | 5.0463  |
| H                                               | -3.571  | -4.4726 | 6.6881  | C | -3.5041 | -5.2472 | 6.3894  | H                                               | -3.5529 | -5.9109 | 7.2611  |
| H                                               | -3.2954 | -7.2367 | 4.1126  | C | -2.6128 | -7.0482 | 4.9415  | H                                               | -4.4755 | -5.3317 | 5.8926  |
| H                                               | -1.5662 | -7.5378 | 4.3524  | C | -1.0106 | -5.6426 | 6.2543  | H                                               | -3.3979 | -4.2234 | 6.7658  |
| H                                               | -2.6884 | -7.884  | 5.6382  | C | -0.3286 | 1.3347  | -2.6797 | H                                               | -3.482  | -7.0784 | 4.2772  |
| H                                               | 0.226   | 2.38    | -1.4707 | C | 1.3969  | -0.3211 | -1.8677 | H                                               | -1.7657 | -7.4938 | 4.4184  |
| H                                               | -1.2892 | 1.9441  | -2.251  | O | -0.6693 | -1.0398 | -2.8122 | H                                               | -2.823  | -7.7197 | 5.7835  |
| H                                               | 1.9609  | 0.017   | -2.536  | N | -1.069  | -5.6753 | 7.5557  | H                                               | -1.3906 | 1.452   | -2.9319 |
| H                                               | 1.5623  | -1.191  | -1.3688 | C | 0.1527  | 2.5667  | -1.9084 | H                                               | 0.1736  | 1.3009  | -3.6576 |
| H                                               | 1.9288  | 0.4691  | -0.8194 | C | -0.039  | 3.8196  | -2.7209 | H                                               | 1.9018  | -0.0856 | -2.8123 |
| H                                               | -0.4655 | -1.5505 | -2.4354 | C | 0.9031  | 4.5404  | -3.3603 | H                                               | 1.5807  | -1.3877 | -1.7043 |
| H                                               | -0.0554 | 1.3057  | -4.3368 | C | 0.5331  | 5.7982  | -4.1041 | H                                               | 1.8803  | 0.256   | -1.0739 |
| H                                               | 1.4474  | 1.819   | -3.6047 | C | 2.3659  | 4.1947  | -3.4225 | H                                               | -0.2221 | -0.9897 | -3.6752 |
| H                                               | -0.9699 | 3.5227  | -4.3947 | O | 0.1923  | -5.7394 | 8.1514  | H                                               | 1.1943  | 2.4499  | -1.599  |
| H                                               | -0.6489 | 5.7627  | -4.8931 | H | -1.4998 | -4.1182 | -0.0912 | H                                               | -0.4257 | 2.6855  | -0.9852 |
| H                                               | 0.4337  | 6.5518  | -3.7392 | H | -2.6139 | -4.997  | 0.9261  | H                                               | -1.0726 | 4.1651  | -2.7632 |
| H                                               | 1.0115  | 6.1389  | -5.3693 | H | -3.2256 | -3.7413 | -0.072  | H                                               | 0.7816  | 5.6984  | -5.1657 |
| H                                               | 2.4294  | 5.2686  | -2.7983 | H | -0.796  | -2.5036 | 3.3112  | H                                               | -0.536  | 6.0245  | -4.0327 |
| H                                               | 2.9761  | 4.6485  | -4.3698 | H | -3.3942 | -2.2293 | 3.3433  | H                                               | 1.0815  | 6.6538  | -3.6964 |
| H                                               | 2.5819  | 3.5371  | -3.0508 | H | -4.3112 | -2.9555 | 2.0404  | H                                               | 2.953   | 4.9446  | -2.8827 |
| H                                               | -0.2496 | -5.8379 | 9.1924  | H | 1.3279  | -3.179  | 2.3531  | H                                               | 2.5983  | 3.215   | -2.999  |
| <b>Conformer 10: E = -1379.09811452 Hartree</b> |         |         |         | H | 0.5361  | -3.8549 | 0.9432  | H                                               | 2.7037  | 4.1771  | -4.4644 |
| C                                               | -2.3707 | -4.0025 | 0.5572  | H | -2.9601 | -0.2864 | 2.6678  | H                                               | -0.0238 | -5.7566 | 9.103   |
| C                                               | -2.1531 | -2.966  | 1.6975  | H | -1.2577 | -0.5979 | 3.0087  | <b>Conformer 11: E = -1379.09782408 Hartree</b> |         |         |         |
| C                                               | -0.8509 | -3.2867 | 2.5448  | H | -1.7139 | 0.5956  | 1.8294  | C                                               | -3.0198 | -3.5393 | 0.8014  |
| C                                               | -1.991  | -1.4932 | 1.0886  | H | -0.7673 | -2.233  | -0.565  | C                                               | -2.3758 | -2.4895 | 1.7526  |
| C                                               | -3.3896 | -3.057  | 2.6271  | H | -3.9812 | -0.7091 | 0.5209  | C                                               | -0.9746 | -2.9763 | 2.3055  |
| C                                               | -0.8968 | -4.6171 | 3.4212  | H | -3.2894 | -1.8136 | -0.6631 | C                                               | -2.1373 | -1.1062 | 0.9754  |
| C                                               | 0.4448  | -3.0831 | 1.7138  | H | -4.3471 | -4.2456 | 4.0964  | C                                               | -3.343  | -2.3066 | 2.9501  |
| C                                               | -1.9719 | -0.3973 | 2.2091  | H | -3.6522 | -5.211  | 2.8229  | C                                               | -0.9826 | -4.1943 | 3.3243  |
|                                                 |         |         |         | H | -0.2756 | -5.713  | 1.6099  |                                                 |         |         |         |

|   |         |         |         |                                                 |         |         |         |   |         |         |         |
|---|---------|---------|---------|-------------------------------------------------|---------|---------|---------|---|---------|---------|---------|
| C | 0.0827  | -3.0844 | 1.1752  | H                                               | -3.8864 | -4.3693 | 3.3406  | C | -3.1108 | -2.0342 | 3.7197  |
| C | -1.6908 | 0.0391  | 1.9464  | H                                               | -0.6268 | -5.6393 | 1.6983  | C | -1.4103 | -4.358  | 2.7269  |
| C | -1.1149 | -1.331  | -0.1796 | H                                               | -0.8765 | -6.3906 | 3.2503  | C | -0.6157 | -2.7623 | 0.7554  |
| C | -3.3191 | -0.5426 | 0.1595  | H                                               | -2.2479 | -5.7492 | 2.3849  | C | -1.173  | 0.1539  | 2.8861  |
| C | -3.4287 | -3.5287 | 3.869   | H                                               | -1.6947 | -2.9953 | 4.9441  | C | -1.6065 | -0.4718 | 0.4075  |
| C | -1.2036 | -5.5543 | 2.6231  | H                                               | 1.0765  | -4.9634 | 3.4435  | C | -3.3163 | 0.5451  | 1.685   |
| C | -2.0513 | -3.9118 | 4.4452  | H                                               | 0.9446  | -3.2993 | 3.9459  | C | -3.2645 | -3.4546 | 4.2776  |
| C | 0.4346  | -4.2695 | 4.0028  | H                                               | 0.6949  | -1.0118 | 0.9778  | C | -2.2865 | -5.2528 | 1.8202  |
| C | 0.234   | -1.7892 | 0.3589  | H                                               | 0.9299  | -1.9888 | -0.4592 | C | -1.9347 | -4.2379 | 4.2105  |
| C | -1.1863 | -0.0393 | -1.0232 | H                                               | -0.5989 | 0.7415  | -0.529  | C | 0.0129  | -4.9926 | 2.7943  |
| C | -2.6758 | 0.3967  | -0.8762 | H                                               | -3.2406 | 0.3626  | -1.8124 | C | -0.3398 | -1.3121 | 0.3204  |
| C | -2.1278 | -5.0086 | 5.574   | H                                               | -2.7196 | 1.4352  | -0.5258 | C | -1.5429 | 1.0206  | 0.0079  |
| C | 0.4407  | -4.6701 | 5.4765  | H                                               | 0.3279  | -3.7758 | 6.1014  | C | -2.7156 | 1.6603  | 0.8137  |
| C | -0.7092 | -0.0959 | -2.5053 | H                                               | 1.4117  | -5.0986 | 5.7361  | C | -1.9124 | -5.5541 | 5.0682  |
| C | -2.5485 | -4.351  | 6.9081  | H                                               | -2.5429 | -5.0799 | 7.7274  | C | 0.0904  | -6.3093 | 3.5604  |
| C | -3.1401 | -6.1361 | 5.2842  | H                                               | -3.5558 | -3.9264 | 6.849   | C | -1.5878 | 1.3756  | -1.5096 |
| C | -0.7175 | -5.5906 | 5.7979  | H                                               | -1.8616 | -3.547  | 7.1957  | C | -2.2002 | -5.2099 | 6.555   |
| C | 0.8219  | -0.2572 | -2.702  | H                                               | -4.1589 | -5.7514 | 5.1724  | C | -2.9443 | -6.6149 | 4.6558  |
| C | -1.4006 | -1.2083 | -3.3146 | H                                               | -2.8885 | -6.7011 | 4.3841  | C | -0.4982 | -6.1751 | 4.9538  |
| O | -1.1068 | 1.1301  | -3.1444 | H                                               | -3.1755 | -6.8607 | 6.107   | C | -0.3368 | 0.949   | -2.3157 |
| N | -0.5958 | -6.7953 | 6.2762  | H                                               | 1.0518  | -0.0995 | -3.7657 | C | -2.8311 | 0.816   | -2.2258 |
| C | 1.7581  | 0.6551  | -1.8898 | H                                               | 1.1059  | -1.2945 | -2.49   | O | -1.6672 | 2.8117  | -1.5858 |
| C | 1.6643  | 2.1127  | -2.2475 | H                                               | -1.1569 | -1.1158 | -4.3802 | N | 0.0895  | -6.6095 | 6.0327  |
| C | 1.4158  | 3.1596  | -1.4358 | H                                               | -2.4911 | -1.1425 | -3.2522 | C | 0.9965  | 1.4785  | -1.771  |
| C | 1.3525  | 4.5593  | -1.9949 | H                                               | -1.0952 | -2.2073 | -2.9891 | C | 2.13    | 1.133   | -2.7021 |
| C | 1.1902  | 3.0857  | 0.0499  | H                                               | -0.7667 | 1.8678  | -2.6075 | C | 3.1465  | 0.2717  | -2.4988 |
| O | 0.7396  | -7.1727 | 6.4329  | H                                               | 2.7892  | 0.3425  | -2.1017 | C | 4.2019  | 0.0724  | -3.5574 |
| H | -2.3756 | -3.8208 | -0.0336 | H                                               | 1.6176  | 0.4772  | -0.8229 | C | 3.3532  | -0.5634 | -1.2652 |
| H | -3.2864 | -4.4657 | 1.3038  | H                                               | 1.8291  | 2.3132  | -3.3077 | O | 1.3339  | -7.1879 | 5.7743  |
| H | -3.9673 | -3.182  | 0.3889  | H                                               | 1.5151  | 4.5832  | -3.0775 | H | -3.4245 | -2.6087 | 0.3052  |
| H | -0.6166 | -2.153  | 2.9361  | H                                               | 0.3702  | 5.0009  | -1.7974 | H | -4.124  | -3.4522 | 1.6641  |
| H | -3.027  | -1.4695 | 3.5803  | H                                               | 2.1181  | 5.1887  | -1.5296 | H | -4.5969 | -1.8279 | 1.3715  |
| H | -4.3478 | -2.0561 | 2.5881  | H                                               | 0.176   | 3.4207  | 0.2915  | H | -0.5478 | -2.4247 | 2.8313  |
| H | 1.0655  | -3.3334 | 1.5892  | H                                               | 1.3132  | 2.0829  | 0.4629  | H | -2.4304 | -1.5123 | 4.3998  |
| H | -0.1738 | -3.897  | 0.4876  | H                                               | 1.9012  | 3.736   | 0.5707  | H | -4.0731 | -1.5124 | 3.7938  |
| H | -2.498  | 0.3097  | 2.6346  | H                                               | 0.6628  | -8.0779 | 6.7896  | H | 0.3443  | -3.2877 | 0.7449  |
| H | -0.8121 | -0.2105 | 2.5428  |                                                 |         |         |         | H | -1.2366 | -3.2391 | -0.0094 |
| H | -1.4382 | 0.9676  | 1.4263  | <b>Conformer 12: E = -1379.09776823 Hartree</b> |         |         |         | H | -0.3029 | -0.4711 | 3.0907  |
| H | -1.4842 | -2.1362 | -0.8226 | C                                               | -3.7271 | -2.4897 | 1.3475  | H | -0.7698 | 1.1156  | 2.5562  |
| H | -4.057  | -0.0195 | 0.7766  | C                                               | -2.5812 | -1.9719 | 2.2645  | H | -1.6674 | 0.3591  | 3.8414  |
| H | -3.8535 | -1.3182 | -0.3947 | C                                               | -1.2823 | -2.8763 | 2.153   | H | -2.3384 | -0.9369 | -0.2598 |
| H | -4.1133 | -3.2784 | 4.6882  | C                                               | -2.1736 | -0.4761 | 1.8582  | H | -3.6942 | 0.9337  | 2.6363  |



|   |         |         |         |   |         |         |         |   |         |         |         |
|---|---------|---------|---------|---|---------|---------|---------|---|---------|---------|---------|
| H | -4.1695 | 0.1325  | 1.1409  | C | -0.8798 | -3.0133 | 2.6744  | H | -0.6371 | -1.4657 | -0.203  |
| H | -3.5934 | -3.3419 | 5.3149  | C | -2.1654 | -1.2408 | 1.3159  | H | -4.1688 | -0.6917 | 0.5454  |
| H | -4.0706 | -3.9897 | 3.7692  | C | -3.404  | -3.2688 | 2.381   | H | -3.1636 | -1.5213 | -0.6344 |
| H | -2.2644 | -4.9337 | 0.7756  | C | -0.7723 | -4.4524 | 3.3536  | H | -4.2825 | -4.8365 | 3.5025  |
| H | -1.9522 | -6.2929 | 1.8007  | C | 0.4482  | -2.4623 | 2.0842  | H | -3.2381 | -5.437  | 2.2437  |
| H | -3.3308 | -5.2819 | 2.1353  | C | -2.5208 | -0.3605 | 2.5611  | H | 0.2949  | -5.1215 | 1.541   |
| H | -1.1993 | -3.5866 | 4.7137  | C | -0.8203 | -0.8179 | 0.6599  | H | 0.3023  | -6.3063 | 2.8022  |
| H | 0.396   | -5.1752 | 1.7835  | C | -3.138  | -0.8112 | 0.1953  | H | -1.1568 | -6.0599 | 1.883   |
| H | 0.7045  | -4.2833 | 3.2685  | C | -3.32   | -4.6638 | 3.0118  | H | -2.3283 | -3.9046 | 4.7192  |
| H | 0.458   | -0.8844 | 0.9373  | C | -0.3199 | -5.5335 | 2.3445  | H | 1.2938  | -4.2616 | 4.0722  |
| H | 0.0431  | -1.3379 | -0.7018 | C | -2.1644 | -4.7532 | 4.0328  | H | 0.0987  | -3.5039 | 5.118   |
| H | -0.6268 | 1.4645  | 0.4163  | C | 0.2898  | -4.3875 | 4.4941  | H | 0.2715  | -0.3343 | 2.4716  |
| H | -3.492  | 2.1126  | 0.1903  | C | 0.3553  | -1.0029 | 1.6077  | H | 1.2943  | -0.746  | 1.1066  |
| H | -2.3253 | 2.466   | 1.4477  | C | -1.0888 | 0.5955  | 0.1007  | H | -1.0305 | 1.2953  | 0.946   |
| H | 1.1404  | -6.6129 | 3.5947  | C | -2.5686 | 0.5128  | -0.3547 | H | -2.6885 | 0.5402  | -1.442  |
| H | -0.4406 | -7.1141 | 3.0444  | C | -2.2262 | -6.0094 | 4.9745  | H | -3.1273 | 1.3657  | 0.0483  |
| H | -2.068  | -6.0822 | 7.2067  | C | 0.3247  | -5.6092 | 5.4065  | H | 1.0542  | -5.4134 | 6.1971  |
| H | -3.2305 | -4.8744 | 6.7076  | C | -0.1039 | 1.1451  | -0.9773 | H | 0.679   | -6.501  | 4.882   |
| H | -1.5256 | -4.4268 | 6.9194  | C | -3.5664 | -6.0048 | 5.7594  | H | -3.5942 | -6.7943 | 6.5202  |
| H | -3.9575 | -6.2026 | 4.621   | C | -2.1438 | -7.3644 | 4.2552  | H | -4.4259 | -6.1861 | 5.1068  |
| H | -2.7266 | -7.0719 | 3.6895  | C | -1.0494 | -5.9133 | 5.9768  | H | -3.7215 | -5.0505 | 6.2754  |
| H | -2.9543 | -7.4431 | 5.3756  | C | 0.1071  | 0.1689  | -2.1608 | H | -1.1623 | -7.5608 | 3.8219  |
| H | -0.4463 | 1.3287  | -3.3423 | C | -0.5625 | 2.5401  | -1.4284 | H | -2.3224 | -8.1863 | 4.9599  |
| H | -0.2977 | -0.1416 | -2.4073 | O | 1.179   | 1.3177  | -0.3524 | H | -2.8931 | -7.4481 | 3.4619  |
| H | -2.8961 | 1.2071  | -3.2485 | N | -1.2722 | -6.1575 | 7.2373  | H | -0.8557 | -0.1669 | -2.5623 |
| H | -3.7602 | 1.1186  | -1.7345 | C | 0.9999  | 0.6745  | -3.3099 | H | 0.6155  | -0.724  | -1.7743 |
| H | -2.812  | -0.2759 | -2.2907 | C | 0.237   | 1.4226  | -4.3735 | H | 0.2363  | 3.0714  | -1.9548 |
| H | -1.7479 | 3.0599  | -2.5235 | C | 0.5253  | 2.6188  | -4.924  | H | -0.8037 | 3.1676  | -0.562  |
| H | 1.1805  | 1.0961  | -0.7658 | C | -0.3669 | 3.206   | -5.9882 | H | -1.4468 | 2.4969  | -2.071  |
| H | 0.9583  | 2.5706  | -1.6814 | C | 1.7105  | 3.4778  | -4.5767 | H | 1.0727  | 1.9543  | 0.3759  |
| H | 2.0994  | 1.6763  | -3.6474 | O | -0.1147 | -6.0826 | 8.0147  | H | 1.433   | -0.2043 | -3.8057 |
| H | 4.0265  | 0.6926  | -4.4428 | H | -1.0034 | -3.5012 | -0.1229 | H | 1.8431  | 1.2409  | -2.9082 |
| H | 5.1893  | 0.3312  | -3.161  | H | -2.023  | -4.7284 | 0.5842  | H | -0.6441 | 0.8936  | -4.7386 |
| H | 4.2197  | -0.973  | -3.8826 | H | -2.7582 | -3.4663 | -0.3189 | H | -1.2215 | 2.561   | -6.218  |
| H | 4.3076  | -0.3068 | -0.7936 | H | -1.0794 | -2.3596 | 3.533   | H | -0.7605 | 4.1737  | -5.6601 |
| H | 2.5723  | -0.4357 | -0.5141 | H | -3.674  | -2.5877 | 3.1934  | H | 0.1961  | 3.3547  | -6.9154 |
| H | 3.3749  | -1.6257 | -1.5309 | H | -4.2415 | -3.2431 | 1.6726  | H | 1.3719  | 4.4407  | -4.1797 |
| H | 1.6324  | -7.4542 | 6.6645  | H | 1.2468  | -2.5054 | 2.8311  | H | 2.3725  | 3.0311  | -3.8327 |
|   |         |         |         | H | 0.7808  | -3.0769 | 1.2421  | H | 2.3117  | 3.6672  | -5.4723 |
|   |         |         |         | H | -1.8435 | -0.505  | 3.4042  | H | -0.4472 | -6.2859 | 8.9095  |
|   |         |         |         | H | -2.504  | 0.7117  | 2.3448  |   |         |         |         |
|   |         |         |         | H | -3.5393 | -0.5582 | 2.9094  |   |         |         |         |

**Conformer 13:** E = -1379.09762826 Hartree

|   |         |         |        |
|---|---------|---------|--------|
| C | -1.9522 | -3.6593 | 0.3937 |
| C | -2.1016 | -2.8005 | 1.6837 |

**Conformer 14:** E = -1379.09746482 Hartree

|   |         |         |         |   |         |         |         |                                                 |         |         |         |
|---|---------|---------|---------|---|---------|---------|---------|-------------------------------------------------|---------|---------|---------|
| C | -0.9372 | -4.0277 | 0.7239  | H | -2.702  | -0.6312 | 2.77    |                                                 |         |         |         |
| C | -1.7555 | -3.0695 | 1.6364  | H | -2.9625 | 0.2989  | 1.3265  | <b>Conformer 15:</b> E = -1379.09730329 Hartree |         |         |         |
| C | -1.034  | -2.8146 | 3.0227  | H | 0.1057  | -1.6707 | 0.1729  | C                                               | -3.3431 | -2.7507 | 1.0726  |
| C | -1.947  | -1.649  | 0.9191  | H | -3.518  | -1.8245 | -0.6301 | C                                               | -2.5262 | -2.1684 | 2.2624  |
| C | -3.1199 | -3.7517 | 1.9107  | H | -1.9389 | -2.4093 | -1.1494 | C                                               | -1.1391 | -2.9161 | 2.448   |
| C | -0.9456 | -4.0415 | 4.0256  | H | -4.0394 | -5.3751 | 2.9494  | C                                               | -2.2172 | -0.6154 | 2.0196  |
| C | 0.2865  | -2.0179 | 2.8483  | H | -2.4819 | -5.7917 | 2.2736  | C                                               | -3.3815 | -2.3779 | 3.5374  |
| C | -2.9372 | -0.7256 | 1.7093  | H | -0.193  | -5.7419 | 2.825   | C                                               | -1.2226 | -4.4363 | 2.9198  |
| C | -0.5529 | -0.9819 | 0.7127  | H | 1.0562  | -4.583  | 3.2809  | C                                               | -0.1682 | -2.6393 | 1.2681  |
| C | -2.4404 | -1.654  | -0.5388 | H | 0.4265  | -5.7069 | 4.4546  | C                                               | -1.5764 | 0.0548  | 3.2831  |
| C | -3.0214 | -4.9975 | 2.7965  | H | -3.0019 | -3.8872 | 4.5886  | C                                               | -1.3227 | -0.4598 | 0.7535  |
| C | 0.1347  | -5.0675 | 3.6144  | H | 0.5718  | -3.5392 | 5.539   | C                                               | -3.399  | 0.285   | 1.6065  |
| C | -2.3751 | -4.6877 | 4.1615  | H | -0.7669 | -2.4223 | 5.5246  | C                                               | -3.4929 | -3.8385 | 3.9924  |
| C | -0.5205 | -3.4883 | 5.4353  | H | -0.4933 | 0.0004  | 2.6541  | C                                               | -1.7378 | -5.3609 | 1.7928  |
| C | 0.1025  | -0.7053 | 2.0648  | H | 1.0839  | -0.2412 | 1.9483  | C                                               | -2.1023 | -4.4679 | 4.2299  |
| C | -0.81   | 0.2077  | -0.2489 | H | -1.1155 | 1.0736  | 0.3542  | C                                               | 0.2074  | -4.9162 | 3.3165  |
| C | -2.0343 | -0.2771 | -1.0865 | H | -1.8342 | -0.3554 | -2.1598 | C                                               | 0.0238  | -1.1421 | 0.9639  |
| C | -2.4614 | -5.8859 | 5.1815  | H | -2.8586 | 0.4376  | -0.9758 | C                                               | -1.3529 | 1.052   | 0.426   |
| C | -1.1636 | -4.1771 | 6.637   | H | -2.1147 | -3.6862 | 6.8767  | C                                               | -2.7413 | 1.5159  | 0.9633  |
| C | 0.3739  | 0.6741  | -1.1642 | H | -0.5283 | -4.0488 | 7.5165  | C                                               | -2.1304 | -5.826  | 5.0195  |
| C | -3.8716 | -5.929  | 5.8127  | H | -3.9386 | -6.7114 | 6.5782  | C                                               | 0.2546  | -6.2625 | 4.0319  |
| C | -2.205  | -7.2683 | 4.5465  | H | -4.6433 | -6.1318 | 5.0631  | C                                               | -1.1007 | 1.4934  | -1.0523 |
| C | -1.4721 | -5.6285 | 6.3362  | H | -4.1223 | -4.9827 | 6.3051  | C                                               | -2.811  | -5.6112 | 6.3988  |
| C | -0.0558 | 1.9584  | -1.9289 | H | -2.9295 | -7.4963 | 3.7581  | C                                               | -2.8945 | -6.9643 | 4.3261  |
| C | 1.6653  | 0.925   | -0.3788 | H | -1.202  | -7.3527 | 4.1228  | C                                               | -0.6662 | -6.2804 | 5.2393  |
| O | 0.6599  | -0.3378 | -2.1375 | H | -2.2983 | -8.0709 | 5.2884  | C                                               | 0.3637  | 1.2241  | -1.4768 |
| N | -0.9963 | -6.6406 | 7.0027  | H | -0.2717 | 2.7553  | -1.2046 | C                                               | -2.076  | 0.845   | -2.0504 |
| C | 0.9554  | 2.4724  | -2.9632 | H | -0.9922 | 1.7623  | -2.4664 | O                                               | -1.3153 | 2.9155  | -1.0719 |
| C | 0.4187  | 3.6792  | -3.6905 | H | 2.474   | 1.272   | -1.0297 | N                                               | -0.3093 | -6.7132 | 6.4155  |
| C | -0.0545 | 3.7395  | -4.9508 | H | 2.0511  | -0.0032 | 0.0542  | C                                               | 0.8153  | 1.941   | -2.7565 |
| C | -0.5228 | 5.048   | -5.5338 | H | 1.5185  | 1.6638  | 0.4149  | C                                               | 2.2387  | 1.5889  | -3.0995 |
| C | -0.1823 | 2.5662  | -5.8837 | H | 0.9892  | -1.1252 | -1.6723 | C                                               | 2.6696  | 0.7331  | -4.0472 |
| O | -0.1271 | -6.2449 | 8.0216  | H | 1.2351  | 1.6763  | -3.6587 | C                                               | 4.1441  | 0.5244  | -4.2797 |
| H | 0.0926  | -3.7009 | 0.5673  | H | 1.8825  | 2.7839  | -2.4696 | C                                               | 1.7808  | -0.0915 | -4.9377 |
| H | -0.8782 | -5.042  | 1.1109  | H | 0.4465  | 4.5972  | -3.1031 | O                                               | 1.0215  | -7.1342 | 6.4551  |
| H | -1.4046 | -4.1486 | -0.257  | H | -0.4091 | 5.8806  | -4.8317 | H                                               | -2.7808 | -2.7787 | 0.137   |
| H | -1.6938 | -2.1268 | 3.5652  | H | 0.0546  | 5.2898  | -6.4321 | H                                               | -3.6924 | -3.7656 | 1.2519  |
| H | -3.8023 | -3.0622 | 2.4181  | H | -1.5815 | 4.985   | -5.8061 | H                                               | -4.262  | -2.1857 | 0.8956  |
| H | -3.6037 | -4.0207 | 0.9635  | H | 0.5026  | 2.6823  | -6.7299 | H                                               | -0.6536 | -2.4323 | 3.3045  |
| H | 0.7151  | -1.7653 | 3.824   | H | -1.2042 | 2.5058  | -6.2735 | H                                               | -2.9549 | -1.827  | 4.3816  |
| H | 1.0365  | -2.6264 | 2.3326  | H | 0.0305  | 1.6069  | -5.4066 | H                                               | -4.389  | -1.9702 | 3.3873  |
| H | -3.9651 | -1.0954 | 1.6304  | H | 0.1375  | -7.0972 | 8.4165  | H                                               | 0.8225  | -3.0519 | 1.4831  |

|   |         |         |         |   |         |         |         |   |         |         |         |
|---|---------|---------|---------|---|---------|---------|---------|---|---------|---------|---------|
| H | -0.5172 | -3.1339 | 0.3563  | H | 0.5839  | -0.6652 | 1.7757  | H | -2.0056 | 1.3136  | -3.038  |
| H | -0.7221 | -0.4913 | 3.685   | H | 0.6516  | -1.0607 | 0.0745  | H | -3.1183 | 0.9721  | -1.7435 |
| H | -1.2088 | 1.0667  | 3.09    | H | -0.5961 | 1.5636  | 1.0375  | H | -1.8834 | -0.2249 | -2.1741 |
| H | -2.3116 | 0.1588  | 4.0881  | H | -3.398  | 1.9404  | 0.1986  | H | -1.4382 | 3.1982  | -1.9943 |
| H | -1.8048 | -0.9648 | -0.0891 | H | -2.5976 | 2.3036  | 1.713   | H | 0.7684  | 3.0277  | -2.6174 |
| H | -4.0435 | 0.5627  | 2.4468  | H | 1.2935  | -6.4525 | 4.3152  | H | 0.144   | 1.7155  | -3.5888 |
| H | -4.0348 | -0.1782 | 0.8477  | H | -0.0347 | -7.0858 | 3.3728  | H | 2.9814  | 2.1176  | -2.501  |
| H | -4.0738 | -3.8266 | 4.9194  | H | -2.7365 | -6.5038 | 7.0318  | H | 4.761   | 1.1439  | -3.6203 |
| H | -4.0818 | -4.4254 | 3.283   | H | -3.8804 | -5.4004 | 6.3013  | H | 4.4123  | -0.5219 | -4.0999 |
| H | -1.5012 | -4.975  | 0.7985  | H | -2.3457 | -4.7841 | 6.947   | H | 4.4036  | 0.7785  | -5.3127 |
| H | -1.2856 | -6.3553 | 1.8204  | H | -3.911  | -6.6632 | 4.0544  | H | 0.7238  | -0.0338 | -4.6677 |
| H | -2.8159 | -5.523  | 1.8372  | H | -2.3946 | -7.3323 | 3.4292  | H | 1.8827  | 0.2351  | -5.9776 |
| H | -1.595  | -3.7744 | 4.9226  | H | -2.979  | -7.8329 | 4.9913  | H | 2.0654  | -1.1476 | -4.8785 |
| H | 0.8435  | -4.9918 | 2.4268  | H | 0.5075  | 0.1478  | -1.6188 | H | 1.1256  | -7.4195 | 7.3827  |
| H | 0.6726  | -4.1677 | 3.972   | H | 1.034   | 1.5374  | -0.6651 |   |         |         |         |
