# Supplementary material for: DFT approach towards accurate prediction of 1H/13C NMR chemical shifts for dipterocarpol oxime
Source: RSC Adv. 2023 Oct 30;13(45):31811–9. doi: 10.1039/d3ra04688e (PMC10613955; doi:10.1039/d3ra04688e)
Supplement: RA-013-D3RA04688E-s002 [file RA-013-D3RA04688E-s002.xlsx]

## Sheet: 13C Shielding constants
13C Shielding constants using 132 DFT methods
	C1	C2	C3	C4	C5	C6	C7	C8	C9	C10	C11	C12	C13	C14	C15	C16	C17	C18	C19	C20	C21	C22	C23	C24	C25	C26	C27	C28	C29	C30
B3LYP/6-31G	153.559	175.475	26.9642	148.611	135.476	172.74	158.053	149.053	140.7	152.441	170.471	165.675	149.46	139.388	160.513	165.729	139.968	176.963	178.308	116.731	166.498	159.988	168.796	70.8386	62.2743	168.262	176.845	177.784	167.765	170.115
B3LYP/6-31G(d,p)	151.043	172.581	28.2017	146.643	133.072	169.826	155.208	146.583	138.31	149.932	167.526	162.613	147.125	137.479	158.225	163.654	138.21	174.364	175.697	114.35	163.89	156.875	165.138	68.0301	59.8181	165.648	173.846	175.358	165.384	167.625
B3LYP/6-31G(3d,p)	150.233	170.596	25.358	136.859	132.119	168.566	154.687	139.139	137.314	145.93	165.431	161.567	143.338	130.351	157.371	162.593	136.936	173.451	175.148	109.977	162.11	154.632	164.15	65.5159	56.0855	163.097	171.676	174.969	164.941	166.45
B3LYP/6-31G(d,3p)	150.789	172.279	27.487	145.678	132.539	169.949	155.125	146.174	138.289	149.72	167.116	162.297	147.083	137.523	159.259	164.313	138.058	175.436	176.924	113.005	164.417	156.111	164.868	67.1618	57.4659	165.757	173.999	176.386	166.066	168.345
B3LYP/6-31G(3d,3p)	149.409	171.299	24.5006	135.17	131.893	169.738	154.813	137.214	137.176	145.068	165.34	161.974	140.799	128.601	158.87	164.719	136.314	174.696	176.299	109.167	163.475	153.465	165.352	64.9984	54.4419	164.444	173.316	176.095	165.812	167.596
B3LYP/6-31+G(d,p)	151.681	172.111	24.8606	145.292	133.339	169.307	156.405	148.498	138.369	148.2	167.576	161.675	150.097	139.362	154.94	163.863	138.659	175.013	175.793	112.543	164.625	156.413	164.679	68.2736	57.4514	165.676	173.571	173.97	165.976	168.696
B3LYP/6-31++G(d,p)	150.893	172.647	24.77	147.186	133.027	170.238	156.422	150.903	138.743	148.671	167.582	160.899	150.854	141.035	155.154	166.176	137.987	174.332	174.428	112.222	164.603	155.614	165.32	68.4105	57.568	165.527	173.57	172.661	164.485	168.282
B3LYP/6-311G(d,p)	140.324	163.905	7.5632	136.004	121.08	160.864	144.873	136.186	127.128	139.46	158.137	152.235	136.488	127.097	148.94	154.405	126.606	166.594	168.366	100.794	154.615	146.098	154.998	49.1046	39.3439	155.479	164.637	167.819	156.881	159.085
B3LYP/cc-pVDZ	150.511	174.244	24.7687	146.017	131.3	170.669	154.923	145.981	137.362	149.281	168.291	162.99	146.783	137.045	158.594	164.633	137.249	175.77	177.343	113.285	164.65	156.752	165.356	65.498	56.3966	166.177	174.949	176.889	165.877	168.364
B3LYP/DGDZVP	138.15	162.755	4.3435	136.518	118.804	159.424	143.449	135.647	125.38	140.116	156.651	150.945	135.378	126.066	147.122	152.841	125.022	163.017	165.671	100.406	151.862	145.156	153.654	50.1086	40.7378	153.217	162.194	165.454	153.917	156.354
B3LYP/DGDZVP2	138.8	163.765	2.0231	133.571	118.039	160.811	143.872	134.41	125.16	136.768	157.512	151.895	134.977	124.355	147.812	153.315	124.481	165.073	165.998	98.7813	152.408	144.998	154.741	49.9742	39.0956	153.275	162.989	166.967	155.339	157.935
B3PW91/6-31G	157.506	178.225	30.2707	152.151	139.725	176.246	161.845	152.789	144.81	156.271	174.09	169.356	153.124	143.279	163.975	169.268	144.018	179.973	181.468	120.169	169.807	163.722	172.003	73.725	65.2345	171.158	179.416	181.074	171.371	173.335
B3PW91/6-31G(d,p)	154.671	175.15	31.0638	149.856	136.944	173.096	158.677	150.005	142.059	153.452	170.878	165.985	150.451	140.983	161.39	166.904	141.875	177.162	178.639	117.321	166.91	160.312	168.074	70.368	62.2524	168.232	176.174	178.428	168.692	170.562
B3PW91/6-31G(3d,p)	153.771	173.435	28.7849	140.704	136.006	171.884	158.033	143.064	141.071	149.703	168.891	165.008	146.597	133.555	160.44	165.847	140.588	176.258	178.037	113.442	165.163	158.068	167.1	68.0537	58.694	165.813	174.175	177.907	168.117	169.275
B3PW91/6-31G(d,3p)	154.001	174.515	30.3008	148.753	136.159	172.856	158.205	149.343	141.757	153.001	170.155	165.329	150.101	140.755	161.924	167.1	141.498	177.696	179.253	115.986	166.789	159.122	167.41	69.4342	59.977	167.781	175.762	178.79	168.729	170.622
B3PW91/6-31G(3d,3p)	152.998	173.991	28.0077	139.12	135.952	172.999	158.213	141.337	141.055	148.96	168.753	165.42	144.104	131.689	161.746	167.906	139.85	177.239	178.97	112.797	166.381	156.91	168.2	67.5938	57.2359	167.002	175.606	178.834	168.845	170.205
B3PW91/6-31+G(d,p)	155.562	174.642	28.2562	148.686	137.57	172.606	159.347	151.595	142.083	151.784	171.011	165.285	153.353	142.771	157.954	167.203	142.355	177.635	178.472	115.858	167.719	159.78	168.125	70.6936	60.3923	168.378	175.948	176.464	168.984	171.371
B3PW91/6-31++G(d,p)	154.83	175.229	28.0844	150.465	137.184	173.277	159.607	153.733	142.333	152.143	170.905	164.541	154.103	144.406	158.205	169.426	141.621	177.044	176.912	115.536	167.505	158.972	168.605	70.8234	60.3687	168.266	175.77	174.928	167.291	170.952
B3PW91/6-311G(d,p)	144.764	167.073	12.4257	139.915	125.891	164.847	149.088	140.234	131.691	143.67	162.195	156.443	140.517	131.1	152.687	158.332	131.252	169.916	171.7	105.123	158.133	150.334	158.749	52.9737	43.503	158.727	167.577	171.232	160.624	162.518
B3PW91/cc-pVDZ	154.202	176.524	27.5192	148.94	135.283	173.77	158.418	149.255	141.113	152.644	171.457	166.266	150.034	140.464	161.698	167.678	140.962	178.433	180.101	116.105	167.623	160.19	168.214	67.7214	58.5589	168.7	177.119	179.778	169.143	171.212
B3PW91/DGDZVP	142.754	165.573	7.8363	140.291	123.46	163.064	147.648	139.713	129.893	144.385	160.388	154.682	139.413	130.421	150.812	156.224	129.668	166.43	169.166	104.017	155.336	149.03	156.793	52.4582	43.0838	155.981	164.599	169.077	157.699	159.421
B3PW91/DGDZVP2	143.052	167.299	5.5484	137.716	122.574	164.751	148.244	138.419	129.497	141.432	161.792	156.058	138.886	128.461	151.732	157.424	129.043	168.809	169.948	102.456	156.486	149.421	158.548	52.5758	41.5511	156.956	166.368	170.922	159.401	161.406
B97D/6-31G	152.488	174.287	35.4259	146.969	134.486	171.273	156.943	147.297	139.757	150.707	169.061	164.104	148.586	138.263	159.521	164.207	139.44	175.988	177.382	114.91	165.969	158.783	167.121	75.0685	67.1073	167.273	175.72	176.858	167.355	169.051
B97D/6-31G(d,p)	150.186	171.578	35.5444	144.951	132.089	168.696	154.296	144.819	137.382	148.238	166.449	161.336	146.253	136.199	157.393	162.367	137.637	173.745	175.139	112.597	163.648	155.941	163.764	71.966	64.2518	164.907	173.036	174.794	165.239	166.84
B97D/6-31G(3d,p)	149.684	170.004	33.3072	133.826	131.654	167.757	154.148	136.525	137	144.462	164.593	160.861	142.109	128.073	156.826	161.407	136.822	173.174	174.952	108.139	162.096	153.838	163.007	69.7777	60.4117	162.523	171.064	174.748	165.232	166.146
B97D/6-31G(d,3p)	149.891	171.189	34.8973	144.007	131.638	168.762	154.107	144.396	137.414	148.025	166.029	160.971	146.207	136.326	158.28	162.841	137.469	174.751	176.246	111.404	164.065	155.152	163.423	71.0947	62.0275	164.966	173.101	175.708	165.812	167.436
B97D/6-31G(3d,3p)	148.649	170.736	32.5911	131.478	131.736	169.408	154.496	134.226	137.044	143.497	164.662	161.614	139.108	125.702	158.671	164.222	136.235	174.327	176.187	107.015	163.445	152.221	164.728	69.1679	58.7002	164.167	172.946	176.079	165.975	167.43
B97D/6-31+G(d,p)	150.417	170.977	32.3812	143.778	132.764	168.599	155.18	147.577	137.468	146.368	166.546	160.457	150.231	138.56	152.625	162.799	138.334	174.366	175.087	111.178	164.159	155.372	163.754	72.4582	62.3265	165.078	172.65	172.401	165.413	167.748
B97D/6-31++G(d,p)	149.444	171.805	32.5301	146.044	132.149	169.866	154.783	150.736	138.111	146.885	166.191	159.651	151.229	140.805	152.931	165.684	137.334	173.608	173.344	110.636	164.137	154.411	164.476	72.5585	62.2987	164.839	172.563	170.536	163.524	167.442
B97D/6-311G(d,p)	140.32	163.673	17.4283	135.307	121.058	160.452	144.721	135.394	127.09	138.617	157.805	151.687	136.449	126.787	148.964	153.883	127.044	166.813	168.59	100.455	155.308	146.077	154.439	55.1101	46.1538	155.584	164.619	168.017	157.618	159.141
B97D/cc-pVDZ	149.489	172.864	31.9528	144.091	130.19	169.17	153.792	143.948	136.262	147.305	166.892	161.359	145.753	135.577	157.432	162.907	136.496	174.818	176.46	111.269	164.124	155.608	163.6	69.3524	60.6304	165.054	173.798	175.956	165.436	167.24
B97D/DGDZVP	136.873	161.165	12.025	134.302	117.311	157.725	142.13	133.26	124.06	137.876	155.047	149.131	134.131	124.288	145.792	150.888	124.008	161.961	164.731	98.2044	151.347	143.775	151.543	54.0766	45.1039	151.902	160.715	164.445	153.37	155.045
B97D/DGDZVP2	137.636	162.536	9.6842	131.25	116.559	159.285	142.714	131.814	123.834	134.375	156.135	150.362	133.683	122.343	146.763	151.696	123.603	164.415	165.417	96.4138	152.22	143.941	152.968	53.7532	43.5271	152.46	162.037	166.291	155.057	156.975
BPV86/6-31G	152.235	175.093	34.0426	146.819	133.341	171.867	156.798	147.088	138.897	150.672	169.651	164.503	147.999	137.546	159.744	164.848	138.771	176.535	178.041	114.487	166.028	158.804	167.576	73.095	64.8959	167.625	176.329	177.607	167.562	169.366
BPV86/6-31G(d,p)	149.96	172.399	34.0812	144.902	131.059	169.378	154.203	144.77	136.646	148.364	167.105	161.777	145.814	135.648	157.641	163.016	137.034	174.305	175.834	112.301	163.702	156.001	164.211	69.8285	61.9363	165.179	173.593	175.567	165.416	167.17
BPV86/6-31G(3d,p)	149.5	170.694	31.4235	134.126	130.767	168.453	154.074	136.923	136.294	144.701	165.226	161.122	141.773	127.442	156.938	162.218	135.923	173.66	175.576	107.848	162	153.845	163.472	67.2904	58.1379	162.6	171.46	175.45	165.254	166.169
BPV86/6-31G(d,3p)	149.861	172.149	33.4037	143.951	130.734	169.651	154.271	144.432	136.815	148.243	166.832	161.598	145.865	135.843	158.82	163.728	136.974	175.488	177.195	110.997	164.287	155.369	164.039	68.9245	59.6364	165.303	173.723	176.683	166.158	167.999
BPV86/6-31G(3d,3p)	148.717	171.384	30.5343	132.112	130.925	169.905	154.408	134.736	136.419	143.901	165.168	161.741	138.799	125.073	158.712	164.872	135.207	174.896	176.766	106.96	163.54	152.547	164.948	66.7658	56.5326	164.139	173.284	176.635	166.2	167.363
BPV866-31+G(d,p)	151.139	171.71	30.5427	143.41	131.867	168.811	155.387	146.952	136.719	146.407	167.263	160.915	149.336	137.793	153.293	163.188	137.581	174.945	175.709	110.603	164.657	155.568	164.05	70.1026	59.7929	165.344	173.227	173.402	165.855	168.315
BPV866-31++G(d,p)	150.238	172.397	30.3675	145.587	131.464	169.859	155.628	149.741	137.111	146.917	167.2	159.989	150.288	139.881	153.524	166.005	136.776	174.129	173.875	110.128	164.543	154.566	164.81	70.2246	59.8126	165.197	173.152	171.596	163.879	167.797
BPV86/6-311G(d,p)	139.91	164.183	14.7389	134.741	119.649	160.979	144.439	134.896	125.985	138.359	158.268	151.931	135.613	125.797	148.918	154.285	125.998	167.095	169.057	99.2101	154.926	145.823	154.584	51.7676	42.5759	155.493	164.772	168.546	157.559	159.261
BPV86/cc-pVDZ	149.4	173.85	30.5992	144.237	129.284	170.097	153.844	144.147	135.704	147.68	167.774	162.057	145.442	135.225	157.866	163.806	136.029	175.468	177.257	111.092	164.225	155.834	164.228	67.2077	58.3819	165.44	174.4	176.859	165.69	167.706
BPV86/DGDZVP	136.769	162.238	10.592	134.499	116.478	158.65	142.214	133.517	123.549	138.305	155.968	149.808	133.798	123.972	146.274	151.836	123.49	162.642	165.63	97.9445	151.423	144.04	152.164	51.9932	42.8203	152.277	161.429	165.534	153.682	155.577
BPV86/DGDZVP2	137.42	163.321	8.2154	131.454	115.608	160.082	142.733	132.235	123.3	134.898	156.925	150.884	133.353	122.219	147.104	152.427	123.032	164.857	166.035	96.2667	152.128	143.948	153.432	51.6379	41.0898	152.647	162.477	167.098	155.223	157.255
CAMB3LYP/6-31G	158.468	179.405	26.6924	154.131	140.99	177.33	162.803	154.763	145.992	158.066	175.143	170.683	154.166	144.84	164.849	170.444	144.69	180.601	181.909	122.15	169.984	164.547	173.773	72.4841	63.7051	172.346	180.745	181.474	171.442	174.149
CAM-B3LYP/6-31G(d,p)	155.52	176.239	28.1698	151.815	138.177	173.973	159.557	151.92	143.219	155.156	171.742	167.172	151.48	142.592	162.22	167.964	142.599	177.674	178.952	119.21	167.066	161.016	169.693	69.536	61.1497	169.417	177.438	178.696	168.72	171.321
CAM-B3LYP/6-31G(3d,p)	154.253	173.903	25.048	143.436	136.282	172.41	158.527	145.252	141.449	150.825	169.472	165.712	147.992	135.893	161.064	166.561	140.876	176.558	178.193	114.869	165.136	158.653	168.376	67.0686	57.447	166.894	175.225	178.083	167.852	169.784
CAM-B3LYP/6-31G(d,3p)	155.05	175.847	27.3199	150.698	137.326	173.858	159.297	151.3	142.923	154.726	171.1	166.621	151.229	142.325	163.062	168.463	142.244	178.626	180.038	117.712	167.396	160.01	169.224	68.6869	58.7338	169.348	177.441	179.582	169.229	171.866
CAM-B3LYP/6-31G(3d,3p)	153.498	174.72	24.1378	142.267	135.515	173.366	158.578	143.813	140.971	149.996	169.3	165.937	145.894	134.606	162.171	168.011	140.181	177.787	179.271	114.161	166.364	157.623	169.221	66.6426	55.8619	168.059	176.649	179.092	168.723	170.821
CAMB3LYP/6-31+G(d,p)	155.8	176.087	24.8228	150.799	138.086	173.663	160.219	153.069	143.215	153.861	171.462	166.337	153.411	143.846	160.217	167.966	142.691	178.324	179.26	117.514	167.588	160.582	169.12	69.5628	58.8699	169.46	177.19	177.811	169.537	172.428
CAMB3LYP/6-31++G(d,p)	155.271	176.343	24.7423	152.045	137.902	174.306	160.196	154.723	143.489	154.2	171.394	165.828	153.844	145.125	160.333	169.653	142.238	177.813	178.272	117.379	167.607	159.976	169.546	69.7221	58.9776	169.35	177.18	176.885	168.519	172.059
CAM-B3LYP/6-311G(d,p)	144.951	167.631	7.3697	140.947	126.274	165.086	149.373	141.326	132.17	144.585	162.411	156.926	140.941	132.097	152.971	158.794	131.075	170.017	171.694	105.552	157.894	150.321	159.653	50.5758	40.2939	159.413	168.43	171.242	160.229	162.851
CAM-B3LYP/cc-pVDZ	155.025	177.905	24.6885	151.128	136.461	174.845	159.33	151.362	142.312	154.551	172.501	167.583	151.14	142.171	162.683	169.031	141.735	179.118	180.604	118.201	167.871	160.893	170.021	67.005	57.6898	169.994	178.561	180.251	169.27	172.083
CAM-B3LYP/DGDZVP	143.337	166.977	4.1505	142.224	124.591	164.208	148.379	141.739	130.813	146.01	161.456	156.098	140.204	131.897	151.737	157.753	130.151	167.019	169.505	105.794	155.508	149.828	159.003	51.6344	42.0075	157.677	166.493	169.393	157.804	160.607
CAM-B3LYP/DGDZVP2	143.895	167.905	1.7403	139.444	123.801	165.488	148.738	140.585	130.523	142.875	162.292	156.931	139.791	130.201	152.267	158.185	129.495	168.773	169.635	104.14	155.933	149.589	159.978	51.6995	40.2923	157.549	167.128	170.705	159.116	161.992
HCTH/6-31G	154.053	175.01	36.4985	148.241	137.005	172.297	158.549	148.826	142.202	152.204	170.035	165.102	150.781	140.397	160.693	164.937	141.053	177.31	178.773	116.164	167.525	159.867	167.818	74.9427	67.893	168.156	176.507	178.078	168.76	170.326
HCTH/6-31G(d,p)	151.29	171.972	35.9292	145.61	134.003	169.353	155.447	145.693	139.232	149.104	167.049	161.937	147.848	137.574	158.087	162.688	138.655	174.816	176.257	113.122	164.834	156.58	164.06	71.1624	64.2908	165.468	173.53	175.734	166.301	167.789
HCTH/6-31G(3d,p)	151.127	171.252	34.3882	136.112	134.172	168.781	155.592	138.532	139.401	146.121	165.78	162.025	143.624	130.291	157.935	162.154	138.893	174.539	176.23	110.056	163.736	155.021	163.795	69.5803	61.0632	163.52	172.069	175.829	166.617	167.447
HCTH/6-31G(d,3p)	150.619	171.325	35.3043	144.888	133.391	169.161	154.786	145.489	139.126	149.063	166.375	161.245	147.754	137.853	158.548	162.955	138.439	175.713	177.117	112.251	165.167	155.505	163.431	70.4564	62.1622	165.467	173.626	176.455	166.735	168.182
HCTH/6-31G(3d,3p)	150.107	171.914	33.8334	133.89	134.258	170.273	155.865	136.467	139.573	145.261	165.781	162.536	140.125	127.988	159.487	165.218	138.381	175.75	177.608	109.248	165.1	153.587	165.597	69.0644	59.5026	164.98	173.866	177.272	167.386	168.672
HCTH/6-31+G(d,p)	151.257	171.4	32.8101	144.444	134.301	168.601	156.266	148.865	139.271	147.392	167.236	160.327	152.556	140.922	153.638	164.055	139.127	175.603	176.518	111.72	165.527	155.799	164.089	71.6623	62.255	165.232	173.24	173.34	166.405	168.446
HCTH/6-31++G(d,p)	150.158	172.703	33.0217	146.896	133.571	169.988	155.943	152.052	139.899	147.838	167.108	159.085	153.64	143.208	153.92	166.829	137.971	175.136	174.879	111.393	165.532	154.977	165.047	71.7863	62.412	165.121	173.293	171.553	164.21	168.477
HCTH/6-311G(d,p)	142.456	165.515	20.3273	137.78	124.08	162.386	146.964	137.833	130.113	141.024	159.691	153.569	139.379	129.688	151.015	155.61	129.483	169.135	170.94	103.158	157.92	148.043	156.224	56.6908	48.6151	157.727	166.756	170.163	159.831	161.461
HCTH/cc-pVDZ	150.558	173.439	32.4775	144.485	131.928	169.833	154.872	144.623	137.892	147.934	167.504	161.887	147.276	136.894	158.245	163.341	137.301	176.27	177.945	111.79	165.696	156.2	164.007	68.5913	60.6182	166.142	174.801	177.294	166.849	168.642
HCTH/DGDZVP	138.477	161.973	13.3899	135.285	119.885	158.676	143.786	134.568	126.606	139.104	155.896	149.909	136.591	126.381	146.957	151.494	125.702	163.501	166.21	99.2964	152.964	144.894	152.134	53.4658	45.874	152.78	161.512	165.748	154.862	156.422
HCTH/DGDZVP2	138.821	163.637	10.5227	132.488	118.799	160.437	144.176	132.933	126.128	135.618	157.097	151.087	136.015	124.219	147.976	152.549	125.091	166.248	167.231	97.3738	153.849	145.239	153.666	53.1364	44.2664	153.388	163.113	167.847	156.361	158.418
HSEH1PBE/6-31G	155.188	177.803	27.6353	150.367	136.333	174.94	159.399	150.699	142.243	154.081	172.621	167.283	151.296	141.949	162.887	168.954	142.043	179.619	181.324	117.558	168.661	161.208	169.414	68.1446	59.0816	169.744	178.283	181.032	170.155	172.313
HSEH1PBE/6-31G(d,p)	154.843	175.578	30.2636	150.136	137.124	173.859	159.013	150.73	142.799	154.372	171.119	166.179	151.268	142.122	162.901	168.22	142.484	178.681	180.24	117.353	167.619	159.969	168.405	69.8812	60.3747	168.608	176.713	179.812	169.564	171.518
HSEH1PBE/6-31G(3d,p)	154.102	175.101	28.2388	141.471	137.657	173.75	158.926	143.819	142.365	151.521	169.523	166.133	145.734	133.885	162.584	168.75	140.969	178.178	179.815	114.775	167.226	158.398	168.935	68.0714	58.2641	167.66	176.485	179.681	169.567	171.027
HSEH1PBE/6-31G(d,3p)	154.768	174.772	28.9702	142.761	137.483	173.117	159.052	145.251	142.283	151.787	169.937	166.047	147.968	135.543	161.622	167.314	141.81	177.198	178.955	115.169	166.031	159.269	168.283	68.3853	59.4774	166.725	175.204	178.826	168.923	170.173
HSEH1PBE/6-31G(3d,3p)	158.706	179.549	30.1986	153.727	141.026	177.57	163.031	154.399	146.164	157.887	175.417	170.59	154.558	144.889	165.29	170.675	145.291	181.217	182.743	121.739	170.885	164.956	173.321	74.1611	65.8208	172.24	180.598	182.351	172.433	174.483
HSEH1PBE/6-31+G(d,p)	156.744	175.866	28.2108	149.928	138.55	173.697	160.522	152.732	143.134	152.819	171.948	166.085	154.438	144.491	159.129	168.305	143.465	178.715	179.508	117.115	168.474	160.97	168.899	71.0658	60.6257	169.373	177.102	177.736	169.84	172.655
HSEH1PBE/6-31++G(d,p)	156.066	176.463	27.9015	151.8	138.177	174.253	161.038	154.609	143.347	153.043	171.691	165.35	155.2	145.911	159.399	170.385	142.878	178.165	178.029	116.921	168.29	160.321	169.373	71.3442	60.6736	169.277	176.978	176.31	168.302	172.063
HSEH1PBE/6-311G(d,p)	155.668	176.3	31.0602	151.257	138.046	174.205	159.658	151.416	143.202	154.869	171.986	166.996	151.676	142.398	162.51	168.107	142.962	178.207	179.712	118.701	167.809	161.339	169.19	70.7134	62.7271	169.152	177.186	179.514	169.576	171.536
HSEH1PBE/cc-pVDZ	143.943	167.004	7.9484	141.849	124.712	164.37	148.818	141.271	131.223	145.922	161.675	155.835	140.895	132.072	152.194	157.636	130.987	167.721	170.523	105.575	156.477	150.272	158.12	52.7259	43.5414	157.112	165.834	170.446	158.809	160.602
HSEH1PBE/DGDZPV	144.098	168.841	5.528	139.449	123.682	166.113	149.362	140.021	130.757	143.083	163.192	157.202	140.32	130.172	153.118	158.939	130.284	170.14	171.356	104.034	157.665	150.642	159.899	52.9522	41.9264	158.083	167.644	172.323	160.529	162.541
HSEH1PBE/DGDZPV2	145.947	168.569	13.0202	141.617	127.101	166.189	150.267	141.872	133.038	145.294	163.543	157.644	142.005	132.815	154.113	159.835	132.584	171.263	173.077	106.92	159.37	151.554	160.131	53.8518	44.3009	160.007	168.962	172.645	161.801	163.817
LSDA/6-31G	152.909	177.157	31.5321	147.899	132.677	173.837	157.669	148.119	138.72	151.943	171.662	166.374	148.045	137.665	161.117	166.919	138.678	178.594	180.161	114.677	167.169	159.869	169.424	71.1747	62.5709	169.28	178.463	179.852	168.903	170.959
LSDA/6-31G(d,p)	149.985	173.854	30.6747	145.286	129.731	170.806	154.446	145.147	135.831	148.993	168.542	163.037	145.257	135.092	158.361	164.44	136.253	175.785	177.4	111.862	164.269	156.438	165.386	66.9564	58.6977	166.163	175.083	177.261	166.125	168.194
LSDA/6-31G(3d,p)	148.906	171.314	26.7098	133.119	128.555	169.262	153.683	136.107	134.553	144.314	165.944	161.734	140.332	125.075	156.931	163.038	133.93	174.692	176.776	106.069	161.942	153.496	164.069	63.4686	53.8194	163.013	172.324	176.781	165.446	166.617
LSDA/6-31G(d,3p)	149.9	173.656	29.8661	144.245	129.261	171.157	154.524	144.743	136.001	148.881	168.251	162.864	145.35	135.232	159.661	165.23	136.032	177.129	179.021	110.401	164.935	155.773	165.284	65.9759	56.1886	166.248	175.171	178.612	166.982	169.202
LSDA6-31G(3d,3p)	147.976	172.106	25.4906	131.07	128.468	170.782	153.866	133.861	134.312	143.571	165.624	162.237	137.077	122.421	158.649	165.667	132.874	175.956	177.913	105	163.542	151.914	165.458	62.862	52.0461	164.516	174.126	177.898	166.37	167.707
LSDA/6-31+G(d,p)	151.102	173.207	26.7881	143.246	130.258	169.991	155.057	146.863	135.694	146.763	168.436	162.01	148.48	136.952	153.62	164.026	136.354	176.258	177.235	109.963	165.137	155.815	164.909	66.8664	56.0021	166.194	174.46	174.838	166.637	169.566
LSDA/6-31++G(d,p)	150.289	173.936	26.6052	145.395	130.035	170.941	155.582	149.631	136.078	147.322	168.208	161.092	149.363	139.241	153.758	166.924	135.652	175.374	175.116	109.486	165.028	154.748	165.848	67.0975	56.1228	166.119	174.464	172.751	164.492	168.959
LSDA/6-311G(d,p)	138.163	164.105	8.2226	132.946	116.143	160.855	142.922	133.173	123.185	136.868	158.094	151.43	133.2	123.292	147.982	154.063	123.061	167.222	169.368	96.137	153.902	144.374	154.029	45.9667	36.0864	154.838	164.713	168.982	156.764	158.906
LSDA/cc-pVDZ	149.882	175.988	27.9013	145.569	128.414	172.187	154.578	145.436	135.512	149.245	169.866	163.889	145.59	135.566	159.212	165.882	135.813	177.508	179.47	111.39	165.318	156.716	165.94	64.8639	55.8389	166.865	176.385	179.232	166.901	169.311
LSDA/DGDZPV	137.202	164.486	7.3936	135.481	115.545	160.856	143.064	134.546	123.265	139.565	158.203	151.816	133.742	123.963	147.757	154.115	123.062	164.892	168.14	97.7713	152.686	145.195	154.018	49.2955	39.8472	153.869	163.633	168.297	155.031	157.437
LSDA/DGDZPV2	137.639	165.12	4.9573	132.266	114.356	161.96	143.315	133.33	122.883	136.011	158.9	152.548	133.203	122.403	148.312	154.279	122.468	166.703	168.029	96.0092	152.935	144.624	154.804	48.7183	37.8276	153.66	164.069	169.384	156.27	158.59
M062X/6-31G	158.165	180.108	11.3923	154.037	139.045	178.956	163.15	154.438	144.302	158.223	176.661	171.962	153.369	143.309	165.218	171.39	143.242	181.496	183.216	121.272	170.01	165.62	174.721	60.5368	51.6677	172.754	181.895	182.907	172.088	175.351
M062X/6-31G(d,p)	154.48	176.109	12.7599	151.387	135.723	174.837	158.951	151.334	141.1	155.05	172.347	167.504	150.197	140.921	161.796	168.085	140.864	177.576	179.392	117.751	166.008	161.217	169.791	56.2348	48.076	168.808	177.326	179.291	168.216	171.817
M062X/6-31G(3d,p)	151.844	174.061	9.5413	136.749	130.212	171.309	156.17	140.228	137.637	146.576	169.631	164.37	144.92	132.679	159.232	165.574	135.501	176.999	179.133	109.915	164.178	155.934	168.63	52.8126	43.7755	166.669	175.195	178.434	167.824	169.527
M062X/6-31G(d,3p)	153.524	175.38	11.6535	149.741	134.241	174.075	158.204	150.145	140.468	154.188	171.324	166.393	149.438	140.176	161.94	167.709	139.773	177.879	179.819	115.987	164.645	159.954	168.569	54.8141	45.4295	167.86	176.244	179.526	167.309	171.686
M062X/6-31G(3d,3p)	149.881	177.84	8.9638	132.69	127.377	176.056	156.9	137.556	136.508	143.449	170.851	166.194	141.336	131.108	161.833	173.703	132.12	177.992	180.329	106.576	164.696	153.833	171.559	51.8701	40.6883	167.257	176.94	179.429	169.215	169.86
M062X/6-31+G(d,p)	150.413	179.802	10.6257	150.485	137.206	173.367	156.657	152.209	140.984	155.5	171.217	166.77	152.392	138.351	159.196	170.482	139.087	178.106	181.325	117.919	165.864	157.389	170.074	54.7388	47.4811	169.45	174.433	176.404	171.901	172.279
M062X/6-31++G(d,p)	148.834	181.214	11.8766	151.519	137.13	175.169	156.145	154.435	142.007	156.158	170.17	165.968	152.514	141.202	159.443	172.663	137.67	176.525	179.113	115.909	166	155.536	170.773	54.0204	46.6891	169.491	173.78	174.885	165.718	173.073
M062X/6-311G(d,p)	144.207	168.211	-7.1126	141.865	124.918	166.642	149.49	141.602	131.191	145.469	163.55	157.933	140.427	130.927	152.831	159.269	130.492	169.946	172.161	105.709	156.56	151.357	160.273	37.4614	28.3714	158.45	167.753	171.786	159.818	163.337
M062X/cc-pVDZ	154.42	177.403	7.9841	150.357	133.866	175.831	159.137	150.228	140.085	154.016	173.369	168.226	149.685	139.827	162.577	169.187	140.096	179.196	181.329	116.444	166.834	161.604	170.239	52.7144	43.0387	169.599	178.647	181.234	168.88	173.02
M062X/DGDZVP	144.13	167.333	-12.9171	142.833	122.21	166.301	149.106	141.657	129.307	146.393	163.283	157.404	139.574	130.832	152.558	158.516	129.238	168.367	171.841	105.682	156.102	151.002	159.864	37.7774	27.0576	157.896	167.611	171.558	159.123	162.195
M062X/DGDZVP2	144.192	167.927	-14.7201	140.476	121.069	167.324	149.909	140.005	128.822	143.843	164.355	158.4	138.83	128.404	153.145	159.291	128.929	169.935	171.905	104.077	154.98	152.291	160.339	37.9723	25.6125	158.176	168.367	172.739	158.583	163.644
mPW1PW91/6-31G	159.078	179.441	30.1025	153.876	141.566	177.68	163.357	154.602	146.588	158.075	175.537	170.815	154.768	145.13	165.387	170.736	145.631	181.178	182.703	121.955	171.032	165.218	173.427	74.3703	65.8606	172.337	180.543	182.33	172.628	174.608
mPW1PW91/6-31G(d,p)	156.141	176.292	31.1265	151.523	138.697	174.401	160.084	151.739	143.748	155.166	172.195	167.319	152.007	142.771	162.721	168.275	143.423	178.262	179.76	118.979	168.037	161.695	169.39	71.0433	62.9103	169.335	177.214	179.577	169.858	171.737
mPW1PW91/6-31G(3d,p)	155.135	174.639	28.9844	142.898	137.601	173.141	159.318	145.113	142.608	151.478	170.217	166.302	148.213	135.557	161.734	167.18	142.123	177.322	179.089	115.345	166.287	159.447	168.41	68.8558	59.4381	166.994	175.279	178.968	169.195	170.404
mPW1PW91/6-31G(d,3p)	155.274	175.539	30.331	150.379	137.738	173.992	159.414	150.993	143.298	154.628	171.309	166.49	151.543	142.425	163.046	168.311	142.916	178.641	180.188	117.647	167.738	160.305	168.557	70.1255	60.6125	168.717	176.651	179.758	169.72	171.595
mPW1PW91/6-31G(3d,3p)	154.334	175.17	28.2346	141.424	137.44	174.16	159.436	143.531	142.513	150.787	170.022	166.622	145.814	133.801	162.889	169.086	141.331	178.256	179.984	114.746	167.434	158.267	169.396	68.4127	58.0145	168.067	176.597	179.85	169.873	171.265
mPW1PW91/6-31+G(d,p)	156.844	175.885	28.4256	150.428	139.184	173.916	160.474	153.142	143.707	153.558	172.302	166.603	154.772	144.522	159.504	168.598	143.804	178.677	179.628	117.58	168.82	161.07	169.413	71.3835	61.0183	169.468	177.061	177.702	170.148	172.511
mPW1PW91/6-31++G(d,p)	156.207	176.48	28.2965	152.104	138.802	174.456	160.746	155.102	143.906	153.87	172.121	165.899	155.461	146.06	159.73	170.678	143.111	178.17	178.116	117.307	168.569	160.282	169.856	71.536	61.0072	169.391	176.889	176.205	168.504	172.142
mPW1PW91/6-311G(d,p)	146.309	168.457	13.0353	141.786	127.785	166.299	150.596	142.124	133.56	145.557	163.65	157.89	142.292	133.065	154.154	159.849	132.981	171.2	172.972	107.182	159.425	151.826	160.22	54.0845	44.5408	160.005	168.846	172.534	161.868	163.831
mPW1PW91/cc-pVDZ	155.565	177.607	27.5125	150.478	136.94	174.977	159.729	150.889	142.702	154.253	172.663	167.48	151.507	142.163	162.952	168.944	142.413	179.509	181.185	117.7	168.719	161.456	169.446	68.3127	59.0994	169.738	178.108	180.894	170.258	172.334
mPW1PW91/DGDZVP	144.524	166.901	7.9579	142.118	125.45	164.542	149.301	141.66	131.798	146.299	161.854	156.164	141.214	132.478	152.362	157.717	131.538	167.78	170.509	105.89	156.671	150.6	158.3	53.0419	43.6569	157.248	165.785	170.448	159.074	160.729
mPW1PW91/DGDZVP2	144.692	168.768	5.644	139.677	124.497	166.28	149.882	140.346	131.341	143.442	163.38	157.583	140.646	130.455	153.3	159.07	130.854	170.166	171.339	104.32	157.872	151.068	160.13	53.253	42.1327	158.311	167.67	172.323	160.775	162.721
PBEPBE/6-31G	152.792	175.582	34.5132	147.548	134.202	172.403	157.384	147.9	139.786	151.507	170.167	164.95	148.842	138.464	160.252	165.272	139.407	177.076	178.627	115.117	166.523	159.236	167.952	72.9484	65.0045	167.909	176.658	178.139	168.048	169.832
PBEPBE/6-31G(d,p)	150.365	172.751	34.2855	145.433	131.722	169.793	154.641	145.383	137.339	149.004	167.498	162.098	146.458	136.332	157.995	163.311	137.476	174.748	176.321	112.689	164.077	156.286	164.456	69.4455	61.7855	165.358	173.819	176.005	165.786	167.525
PBEPBE/6-31G(3d,p)	149.951	171.273	31.7235	135.05	131.483	168.949	154.562	137.827	137.065	145.391	165.769	161.596	142.438	128.24	157.384	162.577	136.51	174.17	176.091	108.617	162.466	154.261	163.835	67.0867	58.0575	162.933	171.845	175.9	165.669	166.603
PBEPBE/6-31G(d,3p)	150.094	172.417	33.5938	144.533	131.275	169.958	154.519	145.092	137.432	148.922	167.104	161.777	146.483	136.547	159.019	163.948	137.335	175.91	177.638	111.471	164.655	155.505	164.161	68.6038	59.4768	165.462	173.953	177.1	166.513	168.305
PBEPBE/6-31G(3d,3p)	149.098	171.966	30.8734	133.029	131.569	170.346	154.813	135.726	137.198	144.566	165.672	162.115	139.39	125.873	159.069	165.248	135.691	175.419	177.339	107.772	164.033	152.95	165.251	66.56	56.4484	164.405	173.642	177.119	166.633	167.78
PBEPBE/6-31+G(d,p)	151.338	172.174	30.6189	143.943	132.371	169.092	155.602	147.568	137.305	147.09	167.763	161.095	150.143	138.723	153.661	163.642	137.888	175.448	176.341	110.997	165.198	155.764	164.301	69.677	59.5478	165.41	173.484	173.871	166.324	168.733
PBEPBE/6-31++G(d,p)	150.465	172.996	30.4719	146.174	131.946	170.089	155.926	150.335	137.625	147.582	167.786	160.146	151.082	140.84	153.859	166.438	137.11	174.726	174.49	110.542	165.041	154.803	165.153	69.8159	59.6226	165.297	173.436	172.038	164.252	168.254
PBEPBE/6-311G(d,p)	140.354	164.921	15.5306	135.625	120.382	161.599	144.946	135.769	126.814	139.267	158.854	152.356	136.502	126.802	149.495	154.795	126.602	167.827	169.827	100.013	155.571	146.224	155.037	51.8769	42.8855	155.982	165.384	169.271	158.1	159.901
PBEPBE/cc-pVDZ	149.699	174.267	30.8918	144.74	129.866	170.469	154.187	144.737	136.333	148.285	168.113	162.261	146.086	135.928	158.192	164.05	136.364	176.004	177.843	111.515	164.667	155.998	164.399	66.7869	58.1972	165.647	174.703	177.405	166.09	168.13
PBEPBE/DGDZVP	137.462	162.876	11.2448	135.22	117.468	159.296	142.953	134.372	124.585	139.154	156.567	150.327	134.82	124.976	146.92	152.364	124.252	163.378	166.388	98.5746	152.101	144.62	152.635	51.7055	42.9395	152.696	161.865	166.259	154.348	156.213
PBEPBE/DGDZVP2	137.932	163.964	8.7036	132.206	116.472	160.719	143.357	133.011	124.261	135.68	157.516	151.318	134.318	123.144	147.732	152.964	123.728	165.551	166.751	96.7758	152.701	144.425	153.81	51.2481	41.1792	152.933	162.843	167.782	155.749	157.785
TPSSTPSS/6-31G	155.021	176.203	36.9923	149.273	137.333	173.713	159.451	149.846	142.501	153.379	171.527	166.417	151.159	140.949	161.863	166.68	142.18	177.927	179.507	117.447	168.026	161.079	169.23	76.3037	67.5184	169.077	177.219	179.076	169.746	171.194
TPSSTPSS/6-31G(d,p)	152.797	173.451	37.5841	147.666	135.357	171.046	156.868	147.899	140.477	151.358	168.837	163.627	149.12	139.455	159.802	164.835	140.707	175.477	177.038	115.523	165.571	158.313	165.894	73.6211	65.3574	166.632	174.434	176.777	167.462	168.849
TPSSTPSS/6-31G(3d,p)	152.234	171.947	34.9918	138.061	134.591	169.953	156.47	140.516	139.915	147.372	167.162	163.035	144.936	130.715	158.896	163.809	139.279	174.872	176.72	111.498	163.94	156.146	165.133	71.6582	61.6353	164.317	172.565	176.492	167.097	167.701
TPSSTPSS/6-31G(d,3p)	152.278	172.9	36.901	146.603	134.763	170.958	156.544	147.305	140.377	151.007	168.248	163.158	148.944	139.319	160.48	165.136	140.435	176.041	177.748	114.206	165.585	157.325	165.399	72.7095	63.0867	166.306	174.117	177.189	167.66	169.015
TPSSTPSS/6-31G(3d,3p)	151.422	172.85	34.2067	136.234	134.587	171.672	156.954	138.672	140.112	146.57	167.166	163.835	141.933	128.226	160.429	166.632	138.395	175.854	177.842	110.719	165.394	154.851	166.668	71.1434	59.9563	165.763	174.242	177.565	168.07	168.661
TPSSTPSS/6-31+G(d,p)	153.679	173.199	34.1996	146.246	136.175	170.248	157.123	149.508	140.196	149.669	169.146	162.99	152.61	141.043	156.002	165.226	140.814	175.977	177.009	113.952	167.084	157.728	166.303	74.0256	63.368	166.673	174.101	173.963	167.732	169.657
TPSSTPSS/6-31++G(d,p)	152.859	174.093	34.1296	148.137	135.775	170.908	157.561	152.034	140.309	150.135	169.125	162.082	153.443	143.348	156.159	167.801	140.006	175.377	174.896	113.502	166.595	156.778	167.054	74.082	63.3486	166.646	173.906	171.864	165.408	169.312
TPSSTPSS/6-311G(d,p)	143.204	165.955	19.7537	138.104	124.541	163.192	147.556	138.459	130.301	141.888	160.504	154.322	139.481	130.101	151.578	156.643	130.321	168.698	170.601	103.39	157.259	148.662	156.974	56.9391	47.4607	157.6	166.355	170.056	159.869	161.326
TPSSTPSS/cc-pVDZ	151.981	174.593	33.8135	146.534	133.346	171.453	156.272	146.839	139.212	150.236	169.124	163.576	148.441	138.614	159.737	165.175	139.347	176.501	178.292	114.006	165.986	157.814	165.663	70.535	61.3926	166.83	175.144	177.894	167.611	169.25
TPSSTPSS/DGDZVP	140.304	163.479	14.5585	137.44	121.352	160.549	145.365	136.814	127.809	141.511	157.918	151.936	137.56	127.987	148.799	153.8	127.776	164.336	167.112	101.453	153.676	146.643	154.114	55.8944	46.3441	153.927	162.369	167.065	156.075	157.393
TPSSTPSS/DGDZVP2	140.641	164.896	11.9221	134.459	120.423	162.13	145.938	135.308	127.4	138.03	159.1	153.194	136.954	125.919	149.76	154.771	127.165	166.684	167.808	99.5977	154.7	146.82	155.676	55.4546	44.566	154.735	163.953	168.829	157.754	159.375
wB97XD/6-31G	160.164	180.275	29.2082	155.082	142.571	178.702	164.344	155.827	147.426	159.18	176.596	172.266	155.563	146.167	166.38	171.975	146.517	181.572	183.063	123.26	171.385	166.173	175.131	74.6939	66.269	173.677	181.775	182.695	172.923	175.3
wB97XD/6-31G(d,p)	157.011	177.032	30.4179	152.648	139.53	175.169	160.848	152.842	144.395	156.115	172.991	168.503	152.682	143.711	163.537	169.242	144.149	178.531	179.952	120.131	168.202	162.501	170.824	71.3426	63.3125	170.504	178.278	179.739	169.971	172.269
wB97XD/6-31G(3d,p)	155.74	175.098	27.3233	147.534	139.369	173.742	159.69	148.663	142.518	154.727	170.708	166.809	148.917	139.137	162.174	168.489	143.481	176.998	178.662	117.944	166.32	160.708	169.568	68.8848	61.1813	167.825	175.953	178.686	168.769	170.427
wB97XD/6-31G(d,3p)	156.273	176.382	29.5329	151.451	138.627	174.78	160.389	152.104	143.952	155.491	172.128	167.694	152.19	143.242	164.005	169.369	143.683	179.1	180.551	118.614	168.024	161.295	170.028	70.5971	60.8413	169.933	177.878	180.086	170.054	172.298
wB97XD/6-31G(3d,3p)	155.647	175.284	26.1978	147.96	139.766	173.225	159.503	148.109	142.113	156.084	169.79	166.246	147.035	138.725	161.487	166.91	143.115	178.177	179.262	118.847	167.363	160.849	169.863	68.7792	60.8539	168.617	176.802	179.309	169.177	171.179
wB97XD/6-31+G(d,p)	158.402	176.622	27.5947	151.338	139.152	174.273	161.946	153.144	144.094	154.156	172.43	167.595	153.672	144.894	163.568	169.019	144.52	179.176	179.963	118.182	168.641	162.27	169.923	71.5151	61.0323	170.708	179.336	179.133	170.324	173.685
wB97XD/6-31++G(d,p)	158.093	176.5	27.9541	152.255	139.321	174.125	162.922	153.932	144.191	153.961	172.207	167.012	153.874	145.405	163.63	169.357	144.154	178.814	179.234	118.363	168.492	161.978	169.9	71.7049	61.2734	170.401	179.226	178.44	170.179	173.356
wB97XD/6-311G(d,p)	147.369	168.935	12.6237	142.661	128.662	166.955	151.532	143.249	134.476	146.437	164.407	159.069	143.138	134.098	155.046	160.755	133.735	171.533	173.168	108.246	159.675	152.898	161.494	54.5333	44.3757	161.105	169.882	172.691	162.073	164.352
wB97XD/cc-pVDZ	156.609	178.504	26.7186	151.713	137.978	176.022	160.698	152.225	143.6	155.388	173.684	168.915	152.364	143.317	163.956	170.246	143.444	179.857	181.426	119.053	168.879	162.475	171.236	68.8722	59.7972	170.895	179.128	181.098	170.475	172.917
wB97XD/DGDZVP	145.188	167.58	6.3655	143.258	126.183	165.392	149.838	142.964	132.223	147.287	162.653	157.403	141.64	133.535	153.048	158.891	132.291	167.912	170.471	107.148	156.462	151.335	159.978	53.1457	43.8427	158.568	167.001	170.409	158.889	161.195
wB97XD/DGDZVP2	145.808	169.277	3.88	140.978	125.411	167.109	150.574	141.908	131.9	144.59	164.109	158.822	141.262	131.768	153.887	160.147	131.544	170.425	171.31	105.808	157.649	152.008	161.775	53.6764	42.2011	159.51	168.759	172.338	160.894	163.117

## Sheet: 1H Shielding constants
1H Shielding constants using 132 DFT methods
	H2-a	H2-b	H18	H19	H21	H23	H24	H26	H27	H28	H29	H30
B3LYP/6-31G	29.3141	30.5691	31.5937	31.7053	31.7106	30.4897	27.0797	31.0209	31.0699	31.5805	31.6376	31.5466
B3LYP/6-31G(d,p)	28.4708	29.7368	30.6743	30.7241	30.7756	29.4223	26.1357	30.0324	30.1343	30.6342	30.7208	30.6285
B3LYP/6-31G(3d,p)	28.2776	29.8194	30.7142	30.7748	30.7831	29.2771	26.1862	29.9011	30.0021	30.6038	30.7378	30.5596
B3LYP/6-31G(d,3p)	28.3182	29.6366	30.558	30.5963	30.6818	29.267	26.0359	29.8352	29.9458	30.5573	30.5717	30.5345
B3LYP/6-31G(3d,3p)	28.1927	29.7239	30.5888	30.6694	30.6811	29.1652	26.0791	29.7198	29.8376	30.4725	30.6503	30.4203
B3LYP/6-31+G(d,p)	28.278	29.6129	30.6451	30.6969	30.7079	29.291	25.9166	29.9176	30.0097	30.6281	30.6598	30.6051
B3LYP/6-31++G(d,p)	28.2703	29.6652	30.625	30.6848	30.6963	29.209	26.0245	29.9036	29.9748	30.6071	30.6369	30.6031
B3LYP/6-311G(d,p)	28.5907	29.943	30.918	30.9462	31.0763	29.5583	26.2589	30.1162	30.2163	30.9179	30.9436	30.9166
B3LYP/cc-pVDZ	28.3435	29.6679	30.5672	30.6027	30.6887	29.2835	26.0953	29.8201	29.942	30.5609	30.5921	30.5535
B3LYP/DGDZVP	28.9259	30.3165	31.2437	31.3081	31.3789	29.9779	26.4826	30.5009	30.563	31.2381	31.2463	31.2379
B3LYP/DGDZVP2	28.5506	29.9225	30.9555	31.033	31.0344	29.6062	25.9975	30.1339	30.2135	30.9172	30.9662	30.9057
B3PW91/6-31G	29.2336	30.5162	31.536	31.6421	31.6607	30.4261	26.9681	30.9463	30.9885	31.5204	31.5741	31.4912
B3PW91/6-31G(d,p)	28.2889	29.4951	30.4916	30.5734	30.5868	29.1899	25.8966	29.8739	29.981	30.4424	30.5553	30.4228
B3PW91/6-31G(3d,p)	28.2035	29.7342	30.6294	30.6859	30.7032	29.1899	26.033	29.8286	29.9239	30.5253	30.6517	30.479
B3PW91/6-31G(d,3p)	28.2348	29.5541	30.478	30.5159	30.6121	29.1836	25.8814	29.7707	29.8725	30.4774	30.4916	30.45
B3PW91/6-31G(3d,3p)	28.1275	29.6506	30.516	30.5886	30.5982	29.0796	25.935	29.6634	29.7761	30.3973	30.569	30.3462
B3PW91/6-31+G(d,p)	28.2169	29.5464	30.5709	30.6403	30.6475	29.2418	25.8134	29.8563	29.9432	30.5636	30.5911	30.5421
B3PW91/6-31++G(d,p)	28.2119	29.6075	30.5565	30.6027	30.6392	29.1639	25.8894	29.84	29.9129	30.5463	30.5746	30.5384
B3PW91/6-311G(d,p)	28.4957	29.842	30.8212	30.8468	30.9855	29.4622	26.1073	30.0275	30.1202	30.815	30.8439	30.8126
B3PW91/cc-pVDZ	28.3025	29.6331	30.531	30.5633	30.6714	29.2479	25.9918	29.7892	29.9017	30.5281	30.5595	30.5186
B3PW91/DGDZVP	28.854	30.2901	31.1958	31.2473	31.3318	29.9186	26.401	30.4514	30.4961	31.1871	31.1985	31.1441
B3PW91/DGDZVP2	28.492	29.854	30.8537	30.9486	30.9659	29.5242	25.9108	30.0623	30.1329	30.8485	30.8749	30.84
B97D/6-31G	29.3563	30.5447	31.5065	31.547	31.6059	30.464	27.1314	30.9695	31.0182	31.6641	31.7137	31.5499
B97D/6-31G(d,p)	28.5012	29.6906	30.6014	30.5854	30.72	29.39	26.1408	30.0634	30.0432	30.7446	30.7372	30.6606
B97D/6-31G(3d,p)	28.3016	29.7853	30.7808	30.7504	30.5172	29.1984	26.2077	29.9305	29.8916	30.7542	30.4821	30.6382
B97D/6-31G(d,3p)	28.3446	29.5826	30.5192	30.4855	30.5915	29.2233	26.0269	29.8781	29.8556	30.6426	30.5736	30.5563
B97D/6-31G(3d,3p)	28.1889	29.6777	30.728	30.7375	30.3533	29.0526	26.1675	29.7794	29.7043	30.6945	30.3144	30.5025
B97D/6-31+G(d,p)	28.2153	29.5241	30.553	30.601	30.6998	29.2197	25.9288	29.9373	29.9554	30.6674	30.5802	30.6297
B97D/6-31++G(d,p)	28.2078	29.5751	30.5584	30.6677	30.6804	29.0971	26.0567	29.8783	29.9322	30.5895	30.56	30.588
B97D/6-311G(d,p)	28.575	29.8424	30.8675	30.8317	30.8829	29.4753	26.2395	30.1232	30.093	30.9979	30.8937	30.8827
B97D/cc-pVDZ	28.3929	29.6184	30.5153	30.4959	30.6054	29.2579	26.0983	29.8799	29.8444	30.6425	30.5835	30.5798
B97D/DGDZVP	28.9755	30.2782	31.2089	31.2072	31.2967	29.9569	26.5315	30.5096	30.5176	31.3412	31.233	31.2201
B97D/DGDZVP2	28.604	29.8748	30.8678	30.8403	31.0352	29.5766	26.0035	30.1601	30.1603	30.9787	30.9812	30.9397
BPV86/6-31G	29.1267	30.3207	31.3602	31.4831	31.5367	30.2414	26.8581	30.8259	30.8796	31.3602	31.4234	31.318
BPV86/6-31G(d,p)	28.39	29.6794	30.612	30.6586	30.7293	29.3522	25.995	29.9613	30.0541	30.5772	30.6503	30.5658
BPV86/6-31G(3d,p)	28.0865	29.6109	30.52	30.5698	30.5984	29.0004	25.9386	29.7315	29.8366	30.3956	30.5453	30.3662
BPV86/6-31G(d,3p)	28.1366	29.394	30.3825	30.4202	30.4805	29.0263	25.7824	29.6756	29.7901	30.3583	30.4028	30.3154
BPV86/6-31G(3d,3p)	28.02	29.5298	30.4008	30.4725	30.5045	28.8864	25.8446	29.5495	29.6785	30.259	30.4722	30.2224
BPV866-31+G(d,p)	28.112	29.373	30.4502	30.5046	30.5298	29.0634	25.6588	29.7651	29.8636	30.4423	30.4599	30.4108
BPV866-31++G(d,p)	28.1044	29.4385	30.4171	30.4922	30.5322	28.9649	25.7704	29.7458	29.8249	30.4141	30.4178	30.4128
BPV86/6-311G(d,p)	28.3999	29.6903	30.744	30.753	30.8718	29.3131	26.0084	29.947	30.0524	30.7344	30.7448	30.6956
BPV86/cc-pVDZ	28.1719	29.4335	30.4141	30.4407	30.5034	29.0617	25.8709	29.6713	29.7978	30.3752	30.4206	30.3529
BPV86/DGDZVP	28.7592	30.0933	31.0567	31.1465	31.187	29.7589	26.2607	30.3467	30.411	31.0516	31.0747	31.0432
BPV86/DGDZVP2	28.3994	29.7044	30.7757	30.8463	30.8809	29.3946	25.7768	29.9913	30.0749	30.7365	30.8095	30.7074
CAMB3LYP/6-31G	29.2784	30.5655	31.5789	31.6757	31.6938	30.5029	27.0144	31.0048	31.0449	31.5735	31.6167	31.5273
CAM-B3LYP/6-31G(d,p)	28.4316	29.7402	30.6487	30.6772	30.7495	29.4301	26.073	30.0043	30.0954	30.6026	30.6691	30.6019
CAM-B3LYP/6-31G(3d,p)	28.2092	29.7777	30.6832	30.7159	30.7582	29.3014	26.108	29.872	29.9636	30.5719	30.6868	30.5274
CAM-B3LYP/6-31G(d,3p)	28.269	29.6312	30.5193	30.5397	30.6485	29.2717	25.9713	29.803	29.9052	30.5014	30.5368	30.4989
CAM-B3LYP/6-31G(3d,3p)	28.1009	29.6612	30.5495	30.5985	30.651	29.188	25.9923	29.692	29.7946	30.4424	30.5878	30.3912
CAMB3LYP/6-31+G(d,p)	28.2332	29.5905	30.6185	30.6374	30.702	29.321	25.9059	29.8659	29.9596	30.6073	30.6357	30.5763
CAMB3LYP/6-31++G(d,p)	28.2227	29.6178	30.6087	30.6472	30.6516	29.2755	25.97	29.8557	29.9401	30.5888	30.6339	30.5773
CAM-B3LYP/6-311G(d,p)	28.5532	29.9525	30.8978	30.9224	31.0551	29.573	26.2024	30.0895	30.177	30.8688	30.9214	30.8673
CAM-B3LYP/cc-pVDZ	28.3078	29.6803	30.5382	30.5732	30.6709	29.2964	26.0301	29.7978	29.9081	30.5349	30.5551	30.523
CAM-B3LYP/DGDZVP	28.8608	30.2983	31.2123	31.2585	31.3469	29.9686	26.3923	30.4659	30.517	31.1991	31.214	31.1821
CAM-B3LYP/DGDZVP2	28.4877	29.9076	30.8993	30.9705	31.0045	29.6041	25.9319	30.0958	30.1614	30.8836	30.9185	30.8813
HCTH/6-31G	30.3243	30.6008	31.5001	31.6059	31.6215	30.5827	30.2743	30.9691	31.0001	31.5001	31.5379	31.4665
HCTH/6-31G(d,p)	28.3853	29.5877	30.5614	30.6204	30.658	29.2571	25.9531	29.9217	30.0147	30.5277	30.6122	30.5104
HCTH/6-31G(3d,p)	28.1747	29.6542	30.5329	30.647	30.6656	29.0736	26.0368	29.7788	29.8797	30.4476	30.6427	30.3861
HCTH/6-31G(d,3p)	28.2503	29.4969	30.4802	30.524	30.5873	29.1148	25.8653	29.7655	29.8579	30.4774	30.4835	30.4448
HCTH/6-31G(3d,3p)	28.0918	29.5852	30.4249	30.642	30.6559	28.9438	26.0068	29.6169	29.7361	30.3207	30.6017	30.2506
HCTH/6-31+G(d,p)	28.0899	29.4251	30.5162	30.575	30.6192	29.042	25.7336	29.7952	29.8768	30.4856	30.5347	30.4486
HCTH/6-31++G(d,p)	28.0802	29.5063	30.4889	30.5834	30.6128	28.9432	25.8413	29.7681	29.8338	30.4779	30.501	30.4273
HCTH/6-311G(d,p)	28.4209	29.6954	30.7452	30.7568	30.8567	29.3054	26.0361	29.943	30.042	30.7346	30.7474	30.7089
HCTH/cc-pVDZ	28.2422	29.492	30.448	30.4971	30.5459	29.0983	25.9183	29.7044	29.814	30.4286	30.4637	30.4165
HCTH/DGDZVP	28.8755	30.1964	31.1493	31.2107	31.266	29.8338	26.38	30.4193	30.4759	31.1484	31.1558	31.1433
HCTH/DGDZVP2	28.4156	29.7069	30.8153	30.8549	30.8894	29.3822	25.8049	29.9956	30.0704	30.7633	30.8423	30.7346
HSEH1PBE/6-31G	29.1887	30.4868	31.5388	31.6045	31.6591	30.3892	26.9256	30.9046	30.9528	31.4906	31.5543	31.4902
HSEH1PBE/6-31G(d,p)	28.3251	29.6375	30.5633	30.6176	30.7064	29.2962	25.9482	29.9017	30	30.5559	30.5958	30.5476
HSEH1PBE/6-31G(3d,p)	28.1694	29.6822	30.5614	30.6231	30.6424	29.1462	25.9584	29.7776	29.871	30.5182	30.6176	30.4822
HSEH1PBE/6-31G(d,3p)	28.1698	29.5111	30.4412	30.4732	30.5856	29.1256	25.8333	29.7043	29.813	30.4274	30.4524	30.4224
HSEH1PBE/6-31G(3d,3p)	28.1291	29.6251	30.4248	30.5056	30.5326	29.0628	25.806	29.6203	29.7289	30.4117	30.49	30.3769
HSEH1PBE/6-31+G(d,p)	28.1889	29.5257	30.5275	30.5926	30.606	29.2052	25.7337	29.7856	29.8679	30.5258	30.5437	30.5091
HSEH1PBE/6-31++G(d,p)	28.1789	29.5821	30.4999	30.5709	30.6233	29.1422	25.809	29.7802	29.8335	30.4933	30.5118	30.4853
HSEH1PBE/6-311G(d,p)	28.4308	29.7962	30.7816	30.8132	30.9504	29.4047	26.0507	29.9627	30.0583	30.7773	30.7899	30.7605
HSEH1PBE/cc-pVDZ	28.2241	29.5856	30.5096	30.5218	30.6487	29.1826	25.9504	29.7228	29.8432	30.5025	30.5107	30.4735
HSEH1PBE/DGDZPV	28.7915	30.267	31.1862	31.2197	31.317	29.8682	26.3441	30.3961	30.4469	31.1544	31.1886	31.1044
HSEH1PBE/DGDZPV2	28.3978	29.7945	30.8269	30.8946	30.9429	29.4472	25.8664	29.9801	30.0599	30.8213	30.8368	30.7817
LSDA/6-31G	28.5756	29.7809	30.8975	31.0142	31.0997	29.7148	26.2628	30.3582	30.4075	30.8904	30.9651	30.8532
LSDA/6-31G(d,p)	27.7483	28.9667	30.0348	30.12	30.1325	28.6667	25.321	29.4087	29.5113	29.9916	30.0953	29.959
LSDA/6-31G(3d,p)	27.5181	29.0657	30.0586	30.0978	30.1384	28.4495	25.3475	29.2445	29.3465	29.923	30.0768	29.9085
LSDA/6-31G(d,3p)	27.5797	28.866	29.9154	29.9449	30.0053	28.4857	25.2123	29.1827	29.2969	29.902	29.9435	29.8419
LSDA6-31G(3d,3p)	27.4386	28.9791	29.9307	29.994	30.0426	28.3321	25.2579	29.045	29.1711	29.7688	29.9799	29.758
LSDA/6-31+G(d,p)	27.572	28.8351	29.9785	30.0246	30.0581	28.5299	25.064	29.2713	29.3762	29.9731	29.9968	29.9566
LSDA/6-31++G(d,p)	27.5985	28.9004	29.9356	30.0262	30.0581	28.4299	25.1897	29.2541	29.3396	29.9308	29.9739	29.9239
LSDA/6-311G(d,p)	27.8528	29.1821	30.2924	30.3169	30.4275	28.7969	25.4403	29.4778	29.578	30.2794	30.3086	30.2454
LSDA/cc-pVDZ	27.6335	28.9345	29.9829	30.0022	30.0663	28.5566	25.3232	29.2191	29.343	29.9557	30.001	29.9152
LSDA/DGDZPV	28.2023	29.5688	30.6021	30.7	30.7254	29.2306	25.6352	29.8602	29.9239	30.5978	30.6329	30.5745
LSDA/DGDZPV2	27.8398	29.1842	30.3199	30.3924	30.4295	28.8709	25.1747	29.5074	29.5837	30.2986	30.361	30.2502
M062X/6-31G	29.133	30.5763	31.6979	31.7067	31.8007	30.4775	26.539	31.1112	31.1295	31.4764	31.7043	31.4434
M062X/6-31G(d,p)	28.4322	29.902	30.787	30.8369	30.8398	29.4748	25.6572	30.1039	30.1975	30.626	30.8065	30.585
M062X/6-31G(3d,p)	28.0542	29.9025	30.6486	30.9439	30.9781	29.2869	25.9277	29.8985	29.9653	30.4271	30.8722	30.3686
M062X/6-31G(d,3p)	28.2635	29.7031	30.5553	30.6298	30.6844	29.2456	25.5432	29.8666	29.9815	30.4892	30.5667	30.4245
M062X/6-31G(3d,3p)	27.8348	29.6711	30.3565	30.9613	31.0113	28.9342	26.058	29.6088	29.754	30.1291	30.865	30.0465
M062X/6-31+G(d,p)	27.9309	29.673	30.6853	30.902	30.9631	29.1957	25.711	29.9992	30.1254	30.6582	30.7134	30.5986
M062X/6-31++G(d,p)	28.0109	29.7185	30.7492	30.8142	31.0214	29.2218	25.5439	29.9185	30.0496	30.6619	30.7508	30.5392
M062X/6-311G(d,p)	28.5764	30.1503	30.9893	31.1035	31.1315	29.6214	25.7627	30.2143	30.2828	30.9286	31.0255	30.8737
M062X/cc-pVDZ	28.3121	29.8504	30.6587	30.7383	30.7621	29.3809	25.5384	29.9353	30.0128	30.5409	30.6761	30.4988
M062X/DGDZVP	28.8472	30.4152	31.2618	31.3679	31.4462	29.9977	25.9864	30.5284	30.5757	31.2041	31.3194	31.1905
M062X/DGDZVP2	28.6249	30.1069	31.0452	31.1055	31.1249	29.749	25.5285	30.2352	30.261	30.8404	31.0876	30.8089
mPW1PW91/6-31G	29.2399	30.5397	31.5598	31.6499	31.6872	30.4453	26.9693	30.957	30.9968	31.5401	31.5929	31.5151
mPW1PW91/6-31G(d,p)	28.3891	29.698	30.6194	30.6632	30.744	29.3629	25.9924	29.9614	30.0515	30.589	30.6484	30.5784
mPW1PW91/6-31G(3d,p)	28.1961	29.7357	30.6329	30.6828	30.7106	29.205	26.0285	29.8285	29.9222	30.5341	30.652	30.4848
mPW1PW91/6-31G(d,3p)	28.2317	29.5652	30.4853	30.518	30.6218	29.1909	25.8762	29.7708	29.8696	30.4741	30.4949	30.4587
mPW1PW91/6-31G(3d,3p)	28.1156	29.6507	30.5199	30.5854	30.6041	29.0909	25.9277	29.6656	29.7747	30.4073	30.5682	30.3539
mPW1PW91/6-31+G(d,p)	28.202	29.5526	30.5773	30.6458	30.6581	29.2455	25.8162	29.8456	29.9281	30.5704	30.5967	30.552
mPW1PW91/6-31++G(d,p)	28.2021	29.6135	30.5631	30.6065	30.6445	29.1718	25.8883	29.8317	29.9014	30.5566	30.5902	30.5423
mPW1PW91/6-311G(d,p)	28.4828	29.8463	30.8179	30.8449	30.9855	29.4602	26.0975	30.0175	30.1078	30.8129	30.8403	30.8044
mPW1PW91/cc-pVDZ	28.2994	29.6499	30.5433	30.569	30.686	29.2569	25.989	29.7903	29.9001	30.5324	30.5681	30.5281
mPW1PW91/DGDZVP	28.8519	30.3143	31.2125	31.2546	31.3478	29.9292	26.399	30.4548	30.4954	31.2005	31.2155	31.1433
mPW1PW91/DGDZVP2	28.4789	29.8591	30.8627	30.9431	30.9729	29.5209	25.9074	30.052	30.1192	30.8508	30.8782	30.837
PBEPBE/6-31G	29.0975	30.293	31.3361	31.4561	31.5063	30.2012	26.797	30.7933	30.8451	31.3346	31.3972	31.2962
PBEPBE/6-31G(d,p)	28.2534	29.4623	30.4606	30.5355	30.5542	29.1423	25.8211	29.8333	29.9376	30.4146	30.5218	30.3919
PBEPBE/6-31G(3d,p)	28.0335	29.5673	30.4852	30.5299	30.5567	28.9536	25.8651	29.6914	29.7923	30.3682	30.5068	30.3364
PBEPBE/6-31G(d,3p)	28.1066	29.3671	30.3614	30.3986	30.4582	28.9866	25.7143	29.6452	29.7545	30.3426	30.3754	30.2961
PBEPBE/6-31G(3d,3p)	27.9696	29.4961	30.3775	30.4427	30.4749	28.8448	25.7734	29.5165	29.6383	30.2423	30.4378	30.2047
PBEPBE/6-31+G(d,p)	28.0497	29.3301	30.4161	30.4698	30.5028	28.9994	25.5855	29.6984	29.7965	30.415	30.4276	30.3871
PBEPBE/6-31++G(d,p)	28.0526	29.4047	30.385	30.4561	30.5052	28.9068	25.6915	29.6809	29.7637	30.3826	30.3995	30.3713
PBEPBE/6-311G(d,p)	28.3399	29.6397	30.6968	30.7027	30.819	29.2468	25.9251	29.8912	29.9941	30.6913	30.6972	30.6477
PBEPBE/cc-pVDZ	28.1159	29.3888	30.3725	30.401	30.4602	28.9975	25.7887	29.6181	29.7413	30.3373	30.3726	30.3145
PBEPBE/DGDZVP	28.7232	30.0644	31.0346	31.1188	31.1575	29.7142	26.1861	30.3102	30.3733	31.0287	31.0447	31.0163
PBEPBE/DGDZVP2	28.3281	29.6474	30.7391	30.8076	30.8344	29.3224	25.6882	29.9305	30.012	30.7054	30.7643	30.6737
TPSSTPSS/6-31G	29.4171	30.6333	31.6254	31.7429	31.7632	30.5369	27.1163	31.0906	31.1305	31.6214	31.6706	31.5859
TPSSTPSS/6-31G(d,p)	28.601	29.8183	30.7453	30.7992	30.8449	29.505	26.1852	30.142	30.2312	30.6994	30.7951	30.6826
TPSSTPSS/6-31G(3d,p)	28.3666	29.8918	30.7307	30.8325	30.837	29.3219	26.2477	30.0055	30.0956	30.6253	30.8278	30.5834
TPSSTPSS/6-31G(d,3p)	28.4297	29.6683	30.6014	30.6315	30.7	29.3178	26.0532	29.9343	30.0276	30.5766	30.604	30.5416
TPSSTPSS/6-31G(3d,3p)	28.247	29.774	30.5863	30.7517	30.7782	29.1674	26.1812	29.8071	29.92	30.4551	30.7219	30.4109
TPSSTPSS/6-31+G(d,p)	28.3689	29.6536	30.7069	30.792	30.7973	29.3494	26.0002	30.012	30.111	30.6965	30.7235	30.681
TPSSTPSS/6-31++G(d,p)	28.395	29.7401	30.7133	30.7326	30.7816	29.2524	26.0926	29.9899	30.0899	30.6843	30.7224	30.6558
TPSSTPSS/6-311G(d,p)	28.676	29.9494	30.9405	30.9548	31.0843	29.5837	26.2857	30.1833	30.2764	30.9401	30.9495	30.914
TPSSTPSS/cc-pVDZ	28.5012	29.7581	30.6618	30.691	30.7681	29.3918	26.1669	29.9588	30.0638	30.6361	30.68	30.6208
TPSSTPSS/DGDZVP	29.0403	30.3812	31.277	31.3528	31.4048	30.047	26.5709	30.5911	30.6375	31.274	31.2845	31.2635
TPSSTPSS/DGDZVP2	28.6902	29.9829	31.0014	31.0718	31.0877	29.6705	26.0615	30.238	30.3033	30.9606	31.0078	30.9439
wB97XD/6-31G	29.3367	30.6258	31.6698	31.7318	31.8239	30.9521	27.0861	30.9546	31.0039	31.6593	31.673	31.5711
wB97XD/6-31G(d,p)	28.4676	29.8065	30.7112	30.74	30.8655	29.9079	26.1377	30.0212	30.0314	30.6715	30.7312	30.6554
wB97XD/6-31G(3d,p)	28.2683	29.7477	30.732	30.781	30.8461	29.8431	26.0437	29.9263	29.9378	30.6279	30.7374	30.5526
wB97XD/6-31G(d,3p)	28.3161	29.6896	30.5778	30.6018	30.7402	29.7369	26.0229	29.8083	29.8324	30.5211	30.5976	30.4938
wB97XD/6-31G(3d,3p)	28.3376	29.7165	30.5007	30.7346	30.8023	29.8005	25.7774	29.798	29.8239	30.4049	30.7105	30.2579
wB97XD/6-31+G(d,p)	28.4479	29.7125	30.6815	30.7003	30.7028	29.9008	25.9057	29.8877	29.8907	30.6445	30.6871	30.5905
wB97XD/6-31++G(d,p)	28.4388	29.744	30.6167	30.7316	30.755	29.5358	25.8891	29.8511	29.917	30.608	30.6253	30.5777
wB97XD/6-311G(d,p)	28.5993	29.9796	30.9053	30.9682	31.1092	29.6162	26.2429	30.1029	30.1824	30.9018	30.9563	30.8508
wB97XD/cc-pVDZ	28.3512	29.7571	30.6359	30.7085	30.83	29.7949	26.1662	29.8355	29.8873	30.6062	30.6865	30.553
wB97XD/DGDZVP	28.8997	30.4063	31.3207	31.3456	31.4583	30.4747	26.503	30.4761	30.5075	31.2396	31.331	31.1861
wB97XD/DGDZVP2	28.4903	29.96	30.9971	31.0209	31.1132	30.0941	26.0874	30.0915	30.0996	30.9103	31.0027	30.8399
